# Supplementary material for: A nutrigenomics approach to study the effects of ω-3 fatty acids in laying hens under physiological stress
Source: Front Physiol. 2023 Jul 25;14:1198247. doi: 10.3389/fphys.2023.1198247 (PMC10407228; doi:10.3389/fphys.2023.1198247)
Supplement: Supplementary file 1 [file DataSheet3.xlsx]

## Sheet: UP All
Id	Gene	Treat_1_1	Treat_1_2	Treat_1_3	Treat_2_4	Treat_2_5	Treat_2_6	Treat_3_7	Treat_3_8	Treat_3_9	norm.Treat_1_1	norm.Treat_1_2	norm.Treat_1_3	norm.Treat_2_4	norm.Treat_2_5	norm.Treat_2_6	norm.Treat_3_7	norm.Treat_3_8	norm.Treat_3_9	baseMean	Treat1	Treat2	Treat3	FoldChange	log2FoldChange	pvalue	padj	dispGeneEst	dispFit	dispMAP	dispersion	betaConv	maxCooks
ENSGALG00000050176	ensembl	130	54	158	54	29	51	114	393	104	129	55	159	55	30	49	103	382	105	118.41	114	45	197	4.416	2.143	6.75651e-05	0.0129251	0.304	0.1146	0.1947	0.1947	TRUE	1.7469
ENSGALG00000023818	HSPB9	71	82	110	72	55	12	226	143	239	70	83	110	73	57	11	205	139	241	110.01	88	47	195	4.143	2.051	4.94839e-05	0.010558	0.2474	0.1213	0.1709	0.1709	TRUE	0.6491
ENSGALG00000005572	ensembl	236	602	280	204	167	147	401	855	623	234	612	281	206	173	141	364	831	627	385.45	376	173	607	3.502	1.808	1.07756e-06	0.000918387	0.1569	0.0544	0.0954	0.0954	TRUE	0.1744
ENSGALG00000031776	NFASC	72	57	49	50	34	29	174	103	130	71	58	49	51	35	28	158	100	131	75.66	59	38	130	3.427	1.777	1.59706e-05	0.00524859	0.0409	0.1637	0.1053	0.1053	TRUE	0.102
ENSGALG00000053916	ABCB1	2463	3074	2451	1286	900	1119	3421	4778	2930	2438	3127	2461	1300	934	1071	3106	4642	2949	2447.52	2675	1102	3566	3.236	1.694	1.2442e-14	1.59469e-10	0.0387	0.0319	0.0342	0.0342	TRUE	0.5655
ENSGALG00000027534	GM2A	2212	2063	2232	1489	1637	1127	2308	8240	3547	2190	2099	2241	1505	1699	1079	2095	8005	3570	2720.25	2177	1428	4557	3.192	1.674	8.21868e-07	0.000810299	0.168	0.0315	0.0827	0.0827	TRUE	0.2389
ENSGALG00000030432	RASSF2	365	470	371	438	118	160	1151	623	404	361	478	372	443	122	153	1045	605	407	443.01	404	239	686	2.864	1.518	0.000268065	0.0296189	0.2335	0.051	0.1222	0.1222	TRUE	0.4373
ENSGALG00000041978	K123	673	815	408	485	292	343	1527	890	577	666	829	410	490	303	328	1386	865	581	650.92	635	374	944	2.525	1.336	5.02485e-05	0.010558	0.1214	0.0435	0.0764	0.0764	TRUE	0.1418
ENSGALG00000007015	CD40	431	217	287	316	185	190	884	549	396	427	221	288	319	192	182	803	533	399	373.7	312	231	578	2.503	1.323	7.62149e-05	0.0139549	0.1068	0.0553	0.0776	0.0776	TRUE	0.1426
ENSGALG00000045658	ABHD14A	202	131	112	86	106	107	227	252	288	200	133	112	87	110	102	206	245	290	165.09	148	100	247	2.474	1.307	3.52655e-05	0.00922443	0.0382	0.0901	0.0649	0.0649	TRUE	0.2655
ENSGALG00000053132	ensembl	117	115	64	162	113	88	312	316	310	116	117	64	164	117	84	283	307	312	173.84	99	122	301	2.471	1.305	9.78732e-05	0.0160826	0.0608	0.0869	0.0752	0.0752	TRUE	0.3958
ENSGALG00000008677	VIM	370	338	428	301	252	304	1218	611	391	366	344	430	304	261	291	1106	594	394	454.39	380	285	698	2.443	1.289	4.80667e-05	0.010558	0.0952	0.0504	0.07	0.07	TRUE	0.217
ENSGALG00000011434	SLC11A1	271	422	228	237	172	214	718	502	316	268	429	229	240	178	205	652	488	318	334.11	309	208	486	2.34	1.227	0.000112005	0.0174339	0.081	0.0585	0.0693	0.0693	TRUE	0.0772
ENSGALG00000005099	ORM1	57947	47460	29188	41105	50484	36733	84439	128522	91325	57361	48283	29302	41553	52386	35172	76659	124853	91916	61942.8	44982	43037	97809	2.273	1.184	3.03052e-06	0.00214445	0.0685	0.0279	0.0464	0.0464	TRUE	0.2454
ENSGALG00000039206	ARID5A	457	381	497	190	130	149	478	416	204	452	388	499	192	135	143	434	404	205	316.89	446	157	348	2.223	1.152	0.000157222	0.0216679	0.0651	0.0602	0.0624	0.0624	TRUE	0.9558
ENSGALG00000027482	SNTB2	527	310	279	138	198	120	354	382	315	522	315	280	140	205	115	321	371	317	287.39	372	153	336	2.197	1.135	0.000245967	0.0288871	0.065	0.0635	0.0644	0.0644	TRUE	0.9424
ENSGALG00000040832	CFD	19623	17858	14808	12054	8015	5628	23305	17108	18253	19425	18168	14866	12185	8317	5389	21158	16620	18371	14944.2	17486	8630	18716	2.169	1.117	6.4426e-06	0.00297681	0.0629	0.0284	0.0441	0.0441	TRUE	0.5413
ENSGALG00000037332	IGFBP7	3203	4494	2730	3238	2405	2337	5394	5163	7262	3171	4572	2741	3273	2496	2238	4897	5016	7309	3967.94	3495	2669	5741	2.151	1.105	3.55686e-06	0.00227941	0.0569	0.0303	0.0407	0.0407	TRUE	0.59
ENSGALG00000011715	HSPA2	1721	1464	1366	1253	932	1213	2185	2941	2329	1704	1489	1371	1267	967	1161	1984	2857	2344	1682.7	1521	1132	2395	2.116	1.081	3.92513e-08	7.18692e-05	0.0203	0.0338	0.0273	0.0273	TRUE	0.0997
ENSGALG00000049658	UTS2R2	508	561	597	250	340	322	833	546	615	503	571	599	253	353	308	756	530	619	499.16	558	305	635	2.086	1.061	2.5843e-06	0.00194841	0.019	0.0483	0.0343	0.0343	TRUE	0.1429
ENSGALG00000010870	JUN	1866	1811	1442	980	382	565	1869	1209	1143	1847	1842	1448	991	396	541	1697	1174	1150	1231.88	1712	643	1340	2.086	1.061	0.000272693	0.0297026	0.0997	0.0361	0.0601	0.0601	TRUE	1.7622
ENSGALG00000036086	TAGLN2	848	746	1024	924	496	555	2041	1049	1245	839	759	1028	934	515	531	1853	1019	1253	970.18	875	660	1375	2.083	1.059	0.000146252	0.0208279	0.0824	0.0383	0.0549	0.0549	TRUE	0.3615
ENSGALG00000025842	BRT-1	963	699	628	583	596	355	1023	1122	1008	953	711	630	589	618	340	929	1090	1015	763.98	765	516	1011	1.96	0.971	0.000126331	0.0188277	0.0491	0.0412	0.0448	0.0448	TRUE	0.6968
ENSGALG00000003933	QSOX1	493	543	420	321	257	282	755	444	524	488	552	422	325	267	270	685	431	527	440.82	487	287	548	1.91	0.933	9.98837e-05	0.0162052	0.0264	0.0511	0.0388	0.0388	TRUE	0.1636
ENSGALG00000049402	ensembl	2522	2770	1842	1373	1149	1032	2476	2982	1631	2497	2818	1849	1388	1192	988	2248	2897	1642	1946.49	2388	1189	2262	1.902	0.927	0.000110682	0.0174339	0.0485	0.033	0.0408	0.0408	TRUE	0.0995
ENSGALG00000036731	GAS2L1	648	710	924	419	476	328	826	924	677	641	722	928	424	494	314	750	898	681	650.2	764	411	776	1.892	0.92	0.000106687	0.0170925	0.0329	0.0436	0.0388	0.0388	TRUE	0.327
ENSGALG00000040453	SRA1	2532	2694	2610	1992	1622	1391	2698	3391	3269	2506	2741	2620	2014	1683	1332	2449	3294	3290	2436.64	2622	1676	3011	1.796	0.845	1.95879e-05	0.00612337	0.0225	0.0319	0.0278	0.0278	TRUE	0.2604
ENSGALG00000006910	IMPDH2	3499	3272	3848	3027	2227	3817	5451	4652	6472	3464	3329	3863	3060	2311	3655	4949	4519	6514	3962.55	3552	3009	5327	1.771	0.824	7.13555e-05	0.0132545	0.0313	0.0303	0.0308	0.0308	TRUE	0.2918
ENSGALG00000033694	IFI30	2435	2737	2054	1523	1386	1334	2977	2724	2155	2410	2784	2062	1540	1438	1277	2703	2646	2169	2114.43	2419	1418	2506	1.767	0.821	6.50314e-06	0.00297681	0.0141	0.0326	0.0234	0.0234	TRUE	0.1032
ENSGALG00000027899	ensembl	1122	1023	728	740	665	735	1149	1274	1398	1111	1041	731	748	690	704	1043	1238	1407	967.99	961	714	1229	1.722	0.784	0.000194326	0.0237446	0.0232	0.0384	0.0308	0.0308	TRUE	0.2291
ENSGALG00000035075	TAP1	1134	1068	838	635	688	607	1233	1208	1011	1123	1087	841	642	714	581	1119	1174	1018	921.98	1017	646	1104	1.709	0.773	4.98361e-05	0.010558	0.0122	0.0389	0.025	0.025	TRUE	0.1817

## Sheet: UP_GO
Term	Overlap	P-value	Adjusted P-value	Old P-value	Old Adjusted P-value	Z-score	Combined Score	Genes
neutrophil degranulation (GO:0043312)	7/480	2.57101e-06	0.000254298	1.67472e-06	0.000165559	-2.01776	25.971	CFD;NFASC;ORM1;GM2A;SLC11A1;IMPDH2;QSOX1
neutrophil mediated immunity (GO:0002446)	7/488	2.86802e-06	0.000254298	1.8672e-06	0.000165559	-1.94339	24.8013	CFD;NFASC;ORM1;GM2A;SLC11A1;IMPDH2;QSOX1
neutrophil activation involved in immune response (GO:0002283)	7/484	2.71611e-06	0.000254298	1.76876e-06	0.000165559	-1.25037	16.0251	CFD;NFASC;ORM1;GM2A;SLC11A1;IMPDH2;QSOX1
platelet degranulation (GO:0002576)	4/125	2.28296e-05	0.00151817	2.11668e-05	0.00140759	-1.4333	15.3184	CFD;ORM1;TAGLN2;QSOX1
regulated exocytosis (GO:0045055)	4/149	4.54382e-05	0.00241731	4.13616e-05	0.00220044	-2.2982	22.98	CFD;ORM1;TAGLN2;QSOX1
response to molecule of bacterial origin (GO:0002237)	3/99	0.000315664	0.0139944	0.00030467	0.0135071	-1.29357	10.4273	CD40;JUN;SLC11A1
antigen processing and presentation of peptide antigen via MHC class I (GO:0002474)	2/29	0.000696717	0.0264753	0.000744351	0.0277673	-1.73734	12.629	TAP1;IFI30
response to lipid (GO:0033993)	3/141	0.000886276	0.0294687	0.000835108	0.0277673	-1.39326	9.79249	CD40;JUN;SLC11A1
response to lipopolysaccharide (GO:0032496)	3/156	0.00118669	0.0350732	0.0011125	0.0328804	-1.70454	11.4828	CD40;JUN;SLC11A1
ceramide transport (GO:0035627)	1/7	0.00941322	0.0985543	0.0104718	0.103329	-3.47515	16.2138	ABCB1
antigen processing and presentation of endogenous peptide antigen (GO:0002483)	1/7	0.00941322	0.0985543	0.0104718	0.103329	-2.96707	13.8433	TAP1
vesicle fusion with endoplasmic reticulum-Golgi intermediate compartment (ERGIC) membrane (GO:1990668)	1/7	0.00941322	0.0985543	0.0104718	0.103329	-2.90331	13.5458	TAP1
defense response to protozoan (GO:0042832)	1/9	0.012087	0.0985543	0.0130735	0.103329	-2.96352	13.0858	SLC11A1
positive regulation of protein kinase C signaling (GO:0090037)	1/8	0.010751	0.0985543	0.0117735	0.103329	-2.85331	12.9334	CD40
positive regulation of dendritic cell antigen processing and presentation (GO:0002606)	1/7	0.00941322	0.0985543	0.0104718	0.103329	-2.7569	12.8627	SLC11A1
T cell mediated immunity (GO:0002456)	1/10	0.0134213	0.0985543	0.0143719	0.103329	-2.87816	12.4075	SLC11A1
cellular response to thyroid hormone stimulus (GO:0097067)	1/11	0.0147538	0.0985543	0.0156687	0.103329	-2.92386	12.3278	GAS2L1
negative regulation of inclusion body assembly (GO:0090084)	1/11	0.0147538	0.0985543	0.0156687	0.103329	-2.83579	11.9564	HSPA2
positive regulation of tumor necrosis factor secretion (GO:1904469)	1/12	0.0160846	0.0985543	0.0169639	0.103329	-2.86127	11.8167	ORM1
positive regulation of adaptive immune response based on somatic recombination of immune receptors built from immunoglobulin superfamily domains (GO:0002824)	1/11	0.0147538	0.0985543	0.0156687	0.103329	-2.80002	11.8056	SLC11A1
iron ion transport (GO:0006826)	1/13	0.0174137	0.0985543	0.0182574	0.103329	-2.87208	11.6334	SLC11A1
regulation of protein kinase C signaling (GO:0090036)	1/12	0.0160846	0.0985543	0.0169639	0.103329	-2.74549	11.3386	CD40
negative regulation of transcription from RNA polymerase II promoter in response to stress (GO:0097201)	1/11	0.0147538	0.0985543	0.0156687	0.103329	-2.67008	11.2577	JUN
regulation of DNA-templated transcription, initiation (GO:2000142)	1/11	0.0147538	0.0985543	0.0156687	0.103329	-2.61518	11.0263	JUN
regulation of dendritic cell antigen processing and presentation (GO:0002604)	1/9	0.012087	0.0985543	0.0130735	0.103329	-2.47344	10.9218	SLC11A1
positive regulation of interleukin-1 production (GO:0032732)	1/13	0.0174137	0.0985543	0.0182574	0.103329	-2.65982	10.7736	ORM1
regulation of inclusion body assembly (GO:0090083)	1/12	0.0160846	0.0985543	0.0169639	0.103329	-2.52188	10.4151	HSPA2
T cell proliferation (GO:0042098)	1/12	0.0160846	0.0985543	0.0169639	0.103329	-2.46146	10.1656	SLC11A1
manganese ion transport (GO:0006828)	1/10	0.0134213	0.0985543	0.0143719	0.103329	-2.35055	10.133	SLC11A1
positive regulation of T-helper 1 type immune response (GO:0002827)	1/13	0.0174137	0.0985543	0.0182574	0.103329	-2.44702	9.91164	SLC11A1
regulation of anion channel activity (GO:0010359)	1/7	0.00941322	0.0985543	0.0104718	0.103329	-2.08675	9.73602	ABCB1
inflammatory response (GO:0006954)	3/253	0.00467505	0.0985543	0.00431492	0.103329	-1.77995	9.55033	CD40;ORM1;SLC11A1
regulation of response to stress (GO:0080134)	1/11	0.0147538	0.0985543	0.0156687	0.103329	-2.23505	9.42353	ABCB1
positive regulation of endothelial cell apoptotic process (GO:2000353)	1/12	0.0160846	0.0985543	0.0169639	0.103329	-2.2692	9.37153	CD40
regulation of interleukin-1 secretion (GO:0050704)	1/10	0.0134213	0.0985543	0.0143719	0.103329	-2.17222	9.36427	ORM1
regulation of T-helper 1 type immune response (GO:0002825)	1/10	0.0134213	0.0985543	0.0143719	0.103329	-2.16068	9.31449	SLC11A1
negative regulation by host of viral transcription (GO:0043922)	1/13	0.0174137	0.0985543	0.0182574	0.103329	-2.24776	9.10455	JUN
positive regulation of antigen processing and presentation (GO:0002579)	1/7	0.00941322	0.0985543	0.0104718	0.103329	-1.90105	8.86962	SLC11A1
purine nucleoside monophosphate biosynthetic process (GO:0009127)	1/13	0.0174137	0.0985543	0.0182574	0.103329	-2.1643	8.7665	IMPDH2
regulation of anion transport (GO:0044070)	1/8	0.010751	0.0985543	0.0117735	0.103329	-1.80966	8.20276	ABCB1
cellular divalent inorganic cation homeostasis (GO:0072503)	2/102	0.00831959	0.0985543	0.0080978	0.103329	-1.71165	8.19733	CD40;SLC11A1
regulation of mRNA stability (GO:0043488)	2/129	0.0130401	0.0985543	0.0126055	0.103329	-1.69117	7.33924	SLC11A1;VIM
response to thyroid hormone (GO:0097066)	1/12	0.0160846	0.0985543	0.0169639	0.103329	-1.66119	6.86054	GAS2L1
cellular response to hormone stimulus (GO:0032870)	2/81	0.00532492	0.0985543	0.00523014	0.103329	-1.29579	6.78393	JUN;GAS2L1
antigen processing and presentation of exogenous peptide antigen via MHC class I (GO:0042590)	2/79	0.00507202	0.0985543	0.00498741	0.103329	-1.25976	6.6566	TAP1;IFI30
negative regulation of cytokine production (GO:0001818)	2/111	0.00978725	0.0985543	0.00950039	0.103329	-1.3062	6.04337	ORM1;SLC11A1
response to cytokine (GO:0034097)	2/139	0.015024	0.0985543	0.014498	0.103329	-1.25253	5.25824	JUN;SLC11A1
regulation of tumor necrosis factor secretion (GO:1904467)	1/16	0.0213906	0.104801	0.0221284	0.107713	-2.62019	10.0741	ORM1
ribonucleoside monophosphate biosynthetic process (GO:0009156)	1/15	0.0200667	0.104801	0.0208397	0.107713	-2.24002	8.75553	IMPDH2
positive regulation of epithelial cell apoptotic process (GO:1904037)	1/17	0.0227128	0.104801	0.0234156	0.107713	-2.2556	8.53706	CD40
positive regulation of vascular smooth muscle cell proliferation (GO:1904707)	1/15	0.0200667	0.104801	0.0208397	0.107713	-2.18019	8.52169	JUN
RNA stabilization (GO:0043489)	1/18	0.0240333	0.104801	0.0247011	0.107713	-2.26843	8.45744	SLC11A1
amide transport (GO:0042886)	1/16	0.0213906	0.104801	0.0221284	0.107713	-2.14026	8.22887	TAP1
positive regulation of collagen metabolic process (GO:0010714)	1/16	0.0213906	0.104801	0.0221284	0.107713	-2.09552	8.05686	VIM
positive regulation of DNA-templated transcription, initiation (GO:2000144)	1/17	0.0227128	0.104801	0.0234156	0.107713	-2.09595	7.93282	JUN
macrophage activation (GO:0042116)	1/18	0.0240333	0.104801	0.0247011	0.107713	-2.1122	7.87494	SLC11A1
response to purine-containing compound (GO:0014074)	1/18	0.0240333	0.104801	0.0247011	0.107713	-1.97245	7.35391	JUN
regulation of collagen biosynthetic process (GO:0032965)	1/18	0.0240333	0.104801	0.0247011	0.107713	-1.89743	7.0742	VIM
positive regulation of collagen biosynthetic process (GO:0032967)	1/16	0.0213906	0.104801	0.0221284	0.107713	-1.82793	7.02805	VIM
positive regulation by host of viral transcription (GO:0043923)	1/18	0.0240333	0.104801	0.0247011	0.107713	-1.4288	5.327	JUN
positive regulation of protein kinase activity (GO:0045860)	2/173	0.0226614	0.104801	0.0217797	0.107713	-1.30699	4.94969	RASSF2;SLC11A1
negative regulation of peptidyl-serine phosphorylation (GO:0033137)	1/19	0.025352	0.107042	0.025985	0.109714	-2.28069	8.38129	RASSF2
response to organophosphorus (GO:0046683)	1/19	0.025352	0.107042	0.025985	0.109714	-2.24121	8.2362	JUN
positive regulation of pri-miRNA transcription from RNA polymerase II promoter (GO:1902895)	1/20	0.026669	0.109138	0.0272673	0.111586	-2.13692	7.74473	JUN
macromolecule biosynthetic process (GO:0009059)	1/20	0.026669	0.109138	0.0272673	0.111586	-2.02017	7.3216	SLC11A1
negative regulation of macroautophagy (GO:0016242)	1/22	0.0292979	0.111537	0.0298271	0.11334	-2.16534	7.64418	QSOX1
peripheral nervous system development (GO:0007422)	1/23	0.0306098	0.111537	0.0311046	0.11334	-2.02533	7.06119	NFASC
cellular response to unfolded protein (GO:0034620)	1/23	0.0306098	0.111537	0.0311046	0.11334	-2.01229	7.01573	HSPA2
lipid translocation (GO:0034204)	1/23	0.0306098	0.111537	0.0311046	0.11334	-1.97105	6.87192	ABCB1
positive regulation of protein autophosphorylation (GO:0031954)	1/23	0.0306098	0.111537	0.0311046	0.11334	-1.96716	6.85838	RASSF2
phospholipid translocation (GO:0045332)	1/22	0.0292979	0.111537	0.0298271	0.11334	-1.92954	6.81173	ABCB1
vacuolar acidification (GO:0007035)	1/21	0.0279843	0.111537	0.028548	0.11334	-1.8182	6.50209	SLC11A1
GTP metabolic process (GO:0046039)	1/22	0.0292979	0.111537	0.0298271	0.11334	-1.61215	5.69126	IMPDH2
positive regulation of ion transmembrane transporter activity (GO:0032414)	1/24	0.03192	0.11321	0.0323806	0.114772	-2.37742	8.18908	ABCB1
negative regulation of viral transcription (GO:0032897)	1/24	0.03192	0.11321	0.0323806	0.114772	-2.0242	6.97242	JUN
transition metal ion homeostasis (GO:0055076)	1/25	0.0332285	0.113318	0.0336549	0.114772	-2.14271	7.29452	SLC11A1
chaperone mediated protein folding requiring cofactor (GO:0051085)	1/25	0.0332285	0.113318	0.0336549	0.114772	-1.85103	6.30155	HSPA2
negative regulation of interleukin-6 production (GO:0032715)	1/25	0.0332285	0.113318	0.0336549	0.114772	-1.48459	5.05405	ORM1
regulation of vascular smooth muscle cell proliferation (GO:1904705)	1/26	0.0345353	0.11483	0.0349276	0.11589	-2.21153	7.4435	JUN
positive regulation of interleukin-1 beta secretion (GO:0050718)	1/26	0.0345353	0.11483	0.0349276	0.11589	-1.81488	6.10847	ORM1
purine ribonucleoside triphosphate biosynthetic process (GO:0009206)	1/28	0.0371437	0.114886	0.0374683	0.11589	-2.84963	9.38371	IMPDH2
regulation of pri-miRNA transcription from RNA polymerase II promoter (GO:1902893)	1/27	0.0358403	0.114886	0.0361988	0.11589	-2.00354	6.66915	JUN
cellular response to topologically incorrect protein (GO:0035967)	1/28	0.0371437	0.114886	0.0374683	0.11589	-1.99762	6.57809	HSPA2
T cell activation involved in immune response (GO:0002286)	1/27	0.0358403	0.114886	0.0361988	0.11589	-1.92129	6.39535	SLC11A1
transition metal ion transport (GO:0000041)	1/28	0.0371437	0.114886	0.0374683	0.11589	-1.66197	5.47279	SLC11A1
modulation by host of viral transcription (GO:0043921)	1/28	0.0371437	0.114886	0.0374683	0.11589	-1.59157	5.24097	JUN
B cell proliferation (GO:0042100)	1/30	0.0397454	0.11879	0.0400027	0.119559	-1.88694	6.08586	CD40
cellular response to cadmium ion (GO:0071276)	1/30	0.0397454	0.11879	0.0400027	0.119559	-1.87891	6.05999	JUN
positive regulation of interleukin-1 secretion (GO:0050716)	1/30	0.0397454	0.11879	0.0400027	0.119559	-1.70587	5.50188	ORM1
positive regulation of interleukin-1 beta production (GO:0032731)	1/32	0.0423403	0.119814	0.0425308	0.120353	-1.61328	5.10121	ORM1
regulation of protein autophosphorylation (GO:0031952)	1/32	0.0423403	0.119814	0.0425308	0.120353	-1.60965	5.08975	RASSF2
'de novo' posttranslational protein folding (GO:0051084)	1/31	0.0410437	0.119814	0.0412675	0.120353	-1.57852	5.0404	HSPA2
negative regulation of tumor necrosis factor superfamily cytokine production (GO:1903556)	1/32	0.0423403	0.119814	0.0425308	0.120353	-1.57777	4.98893	ORM1
response to cadmium ion (GO:0046686)	1/32	0.0423403	0.119814	0.0425308	0.120353	-1.5628	4.94159	JUN
intracellular pH reduction (GO:0051452)	1/34	0.0449284	0.124489	0.0450525	0.12365	-1.82966	5.67686	SLC11A1
mRNA stabilization (GO:0048255)	1/34	0.0449284	0.124489	0.0450525	0.12365	-1.6516	5.1244	SLC11A1
negative regulation of tumor necrosis factor production (GO:0032720)	1/36	0.0475098	0.125125	0.047568	0.125278	-2.1786	6.63779	ORM1
regulation of endothelial cell apoptotic process (GO:2000351)	1/36	0.0475098	0.125125	0.047568	0.125278	-1.75746	5.35465	CD40
negative regulation of DNA binding (GO:0043392)	1/35	0.0462199	0.125125	0.0463111	0.124432	-1.52782	4.69706	JUN
regulation of interleukin-1 beta secretion (GO:0050706)	1/35	0.0462199	0.125125	0.0463111	0.124432	-1.36808	4.20596	ORM1
positive regulation of programmed cell death (GO:0043068)	2/258	0.047092	0.125125	0.0450904	0.12365	-1.21304	3.70663	JUN;RASSF2
lymphocyte proliferation (GO:0046651)	1/37	0.048798	0.127257	0.0488234	0.126088	-1.58101	4.77476	CD40
purine ribonucleoside monophosphate biosynthetic process (GO:0009168)	1/40	0.0526525	0.127623	0.0525801	0.127148	-2.18693	6.43841	IMPDH2
myelination (GO:0042552)	1/38	0.0500845	0.127623	0.0500772	0.126862	-2.05735	6.1598	NFASC
positive regulation of smooth muscle cell proliferation (GO:0048661)	1/38	0.0500845	0.127623	0.0500772	0.126862	-1.74156	5.2143	JUN
muscle filament sliding (GO:0030049)	1/39	0.0513693	0.127623	0.0513294	0.127148	-1.721	5.10917	VIM
positive regulation of phagocytosis (GO:0050766)	1/40	0.0526525	0.127623	0.0525801	0.127148	-1.64332	4.838	SLC11A1
actin-myosin filament sliding (GO:0033275)	1/39	0.0513693	0.127623	0.0513294	0.127148	-1.60582	4.76723	VIM
purine ribonucleoside monophosphate metabolic process (GO:0009167)	1/40	0.0526525	0.127623	0.0525801	0.127148	-1.39836	4.11684	IMPDH2
cytokine-mediated signaling pathway (GO:0019221)	3/634	0.0527765	0.127623	0.0488144	0.126088	-1.2454	3.66359	CD40;VIM;IFI30
peptide transport (GO:0015833)	1/42	0.0552138	0.128832	0.0550768	0.128512	-1.77039	5.12801	TAP1
response to cAMP (GO:0051591)	1/41	0.053934	0.128832	0.0538292	0.128512	-1.57995	4.61343	JUN
regulation of phagocytosis (GO:0050764)	1/42	0.0552138	0.128832	0.0550768	0.128512	-1.58752	4.59832	SLC11A1
positive regulation of viral transcription (GO:0050434)	1/42	0.0552138	0.128832	0.0550768	0.128512	-1.3541	3.9222	JUN
regulation of interleukin-6 production (GO:0032675)	1/43	0.0564919	0.130224	0.0563228	0.12977	-1.84545	5.30318	ORM1
regulation of interferon-gamma production (GO:0032649)	1/44	0.0577684	0.130224	0.0575672	0.12977	-1.79136	5.10772	SLC11A1
positive regulation of interferon-gamma production (GO:0032729)	1/44	0.0577684	0.130224	0.0575672	0.12977	-1.69769	4.84066	SLC11A1
response to unfolded protein (GO:0006986)	1/44	0.0577684	0.130224	0.0575672	0.12977	-1.50009	4.27722	HSPA2
inorganic anion transport (GO:0015698)	1/45	0.0590432	0.131979	0.0588101	0.131458	-1.38252	3.91181	SLC11A1
positive regulation of blood vessel endothelial cell migration (GO:0043536)	1/46	0.0603164	0.133701	0.0600514	0.133114	-1.59195	4.47043	CD40
negative regulation of autophagy (GO:0010507)	1/47	0.0615879	0.135391	0.0612912	0.134136	-1.85531	5.17129	QSOX1
cellular response to heat (GO:0034605)	1/48	0.0628577	0.135936	0.0625294	0.134136	-2.13523	5.90792	HSPA2
positive regulation of tumor necrosis factor production (GO:0032760)	1/48	0.0628577	0.135936	0.0625294	0.134136	-1.64219	4.54374	ORM1
cellular response to mechanical stimulus (GO:0071260)	1/49	0.0641259	0.137187	0.0637661	0.135694	-2.00892	5.51832	CD40
positive regulation of apoptotic process (GO:0043065)	2/308	0.0644676	0.137187	0.0617077	0.134136	-1.53186	4.19972	JUN;RASSF2
regulation of blood vessel endothelial cell migration (GO:0043535)	1/51	0.0666573	0.139613	0.0662348	0.138728	-1.5257	4.13189	CD40
wound healing (GO:0042060)	1/51	0.0666573	0.139613	0.0662348	0.138728	-1.50408	4.07334	SLC11A1
regulation of DNA binding (GO:0051101)	1/53	0.0691821	0.143769	0.0686974	0.142481	-1.24127	3.31546	JUN
glycosphingolipid metabolic process (GO:0006687)	1/55	0.0717004	0.144487	0.0711538	0.142481	-2.15197	5.671	GM2A
cellular response to nutrient levels (GO:0031669)	1/55	0.0717004	0.144487	0.0711538	0.142481	-1.66676	4.39235	GAS2L1
positive regulation of tyrosine phosphorylation of STAT protein (GO:0042531)	1/54	0.0704421	0.144487	0.0699264	0.142481	-1.48545	3.94085	CD40
negative regulation of cellular component organization (GO:0051129)	1/55	0.0717004	0.144487	0.0711538	0.142481	-1.42669	3.75969	HSPA2
cellular iron ion homeostasis (GO:0006879)	1/57	0.0742121	0.148424	0.0736041	0.14611	-2.39967	6.24114	SLC11A1
phospholipid transport (GO:0015914)	1/59	0.0767172	0.151161	0.0760482	0.149843	-1.37271	3.5246	ABCB1
regulation of cell proliferation (GO:0042127)	3/741	0.0767128	0.151161	0.0712405	0.142481	-1.02412	2.62961	CD40;JUN;IGFBP7
regulation of tyrosine phosphorylation of STAT protein (GO:0042509)	1/62	0.0804627	0.153979	0.079703	0.151125	-1.98579	5.0041	CD40
positive regulation of cellular amide metabolic process (GO:0034250)	1/62	0.0804627	0.153979	0.079703	0.151125	-1.94222	4.89432	VIM
regulation of tumor necrosis factor production (GO:0032680)	1/62	0.0804627	0.153979	0.079703	0.151125	-1.29727	3.26906	ORM1
response to reactive oxygen species (GO:0000302)	1/61	0.0792158	0.153979	0.0784862	0.151125	-1.20931	3.06631	JUN
iron ion homeostasis (GO:0055072)	1/64	0.0829515	0.155653	0.0821319	0.153853	-1.46689	3.65183	SLC11A1
positive regulation of gene expression (GO:0010628)	3/772	0.0844251	0.155653	0.0784993	0.151125	-1.46786	3.62839	JUN;SLC11A1;VIM
glycolipid metabolic process (GO:0006664)	1/66	0.0854339	0.155653	0.0845547	0.154052	-1.41454	3.47978	GM2A
positive regulation of JAK-STAT cascade (GO:0046427)	1/65	0.0841935	0.155653	0.083344	0.153955	-1.39229	3.44541	CD40
cellular response to reactive oxygen species (GO:0034614)	1/66	0.0854339	0.155653	0.0845547	0.154052	-1.3199	3.24698	JUN
positive regulation of endocytosis (GO:0045807)	1/65	0.0841935	0.155653	0.083344	0.153955	-1.19024	2.9454	SLC11A1
post-translational protein modification (GO:0043687)	2/358	0.0836625	0.155653	0.0801074	0.151125	-1.05684	2.62198	QSOX1;IGFBP7
response to interferon-gamma (GO:0034341)	1/69	0.0891453	0.161311	0.0881776	0.158704	-1.20133	2.90421	SLC11A1
positive regulation of endothelial cell migration (GO:0010595)	1/71	0.0916115	0.163493	0.0905853	0.159574	-1.47463	3.52466	CD40
transmembrane transport (GO:0055085)	2/379	0.0921955	0.163493	0.0883013	0.158704	-1.23299	2.93926	ABCB1;TAP1
interferon-gamma-mediated signaling pathway (GO:0060333)	1/71	0.0916115	0.163493	0.0905853	0.159574	-1.22634	2.93121	IFI30
defense response to Gram-negative bacterium (GO:0050829)	1/72	0.0928422	0.16355	0.0917869	0.160627	-1.37074	3.25804	SLC11A1
nitrogen compound transport (GO:0071705)	1/75	0.0965246	0.165575	0.0953826	0.162782	-1.71766	4.01581	SLC11A1
positive regulation of JNK cascade (GO:0046330)	1/77	0.0989716	0.165575	0.0977723	0.162782	-1.59951	3.69955	RASSF2
regulation of apoptotic process (GO:0042981)	3/816	0.0959324	0.165575	0.089358	0.159525	-1.54384	3.61894	CD40;JUN;RASSF2
B cell activation (GO:0042113)	1/74	0.0952988	0.165575	0.0941855	0.162684	-1.41641	3.32962	CD40
purine ribonucleotide biosynthetic process (GO:0009152)	1/76	0.0977489	0.165575	0.0965782	0.162782	-1.39493	3.2437	IMPDH2
transforming growth factor beta receptor signaling pathway (GO:0007179)	1/77	0.0989716	0.165575	0.0977723	0.162782	-1.34614	3.11352	JUN
antigen processing and presentation of exogenous peptide antigen via MHC class I, TAP-dependent (GO:0002479)	1/76	0.0977489	0.165575	0.0965782	0.162782	-1.16122	2.70025	TAP1
positive regulation of cytokine secretion (GO:0050715)	1/74	0.0952988	0.165575	0.0941855	0.162684	-1.13398	2.66568	ORM1
positive regulation of translation (GO:0045727)	1/79	0.101412	0.168598	0.100156	0.165475	-1.25202	2.86533	VIM
positive regulation of stress-activated MAPK cascade (GO:0032874)	1/81	0.103846	0.171572	0.102534	0.167325	-1.15322	2.61187	RASSF2
positive regulation of transcription from RNA polymerase II promoter (GO:0045944)	3/849	0.104975	0.172367	0.0979137	0.162782	-1.63189	3.67833	CD40;JUN;SLC11A1
positive regulation of protein phosphorylation (GO:0001934)	2/413	0.106529	0.172786	0.102086	0.167325	-1.62901	3.64791	CD40;RASSF2
negative regulation of binding (GO:0051100)	1/83	0.106274	0.172786	0.104905	0.170152	-1.24919	2.80035	JUN
regulation of MAP kinase activity (GO:0043405)	1/88	0.112316	0.177625	0.110809	0.175224	-1.86405	4.07562	CD40
regulation of peptidyl-serine phosphorylation (GO:0033135)	1/87	0.111111	0.177625	0.109631	0.175224	-1.77436	3.89868	RASSF2
positive regulation of protein complex assembly (GO:0031334)	1/89	0.11352	0.177625	0.111985	0.175224	-1.75297	3.81408	JUN
divalent metal ion transport (GO:0070838)	1/89	0.11352	0.177625	0.111985	0.175224	-1.30684	2.84338	SLC11A1
calcium ion homeostasis (GO:0055074)	1/88	0.112316	0.177625	0.110809	0.175224	-1.26512	2.76609	CD40
organic substance transport (GO:0071702)	1/88	0.112316	0.177625	0.110809	0.175224	-1.20241	2.629	TAP1
regulation of JNK cascade (GO:0046328)	1/91	0.115923	0.180324	0.114333	0.177722	-1.49666	3.22505	RASSF2
positive regulation of cellular protein metabolic process (GO:0032270)	1/92	0.117122	0.18113	0.115505	0.177722	-1.30911	2.80744	VIM
cellular transition metal ion homeostasis (GO:0046916)	1/94	0.119515	0.183478	0.117844	0.180153	-1.43784	3.05444	SLC11A1
vesicle fusion (GO:0006906)	1/95	0.120709	0.183478	0.119012	0.180744	-1.29317	2.73424	TAP1
negative regulation of nucleic acid-templated transcription (GO:1903507)	2/445	0.120543	0.183478	0.115586	0.177722	-1.0801	2.28522	JUN;ARID5A
antigen processing and presentation of exogenous peptide antigen via MHC class II (GO:0019886)	1/98	0.124282	0.183662	0.122505	0.180744	-1.73085	3.60916	IFI30
cellular metal ion homeostasis (GO:0006875)	1/97	0.123093	0.183662	0.121342	0.180744	-1.70202	3.56543	CD40
antigen processing and presentation of exogenous peptide antigen (GO:0002478)	1/98	0.124282	0.183662	0.122505	0.180744	-1.66704	3.47611	IFI30
regulation of cell death (GO:0010941)	1/97	0.123093	0.183662	0.121342	0.180744	-1.25058	2.61974	JUN
epithelial cell differentiation (GO:0030855)	1/97	0.123093	0.183662	0.121342	0.180744	-1.21346	2.54197	TAGLN2
antigen processing and presentation of peptide antigen via MHC class II (GO:0002495)	1/99	0.125471	0.184393	0.123667	0.180744	-1.63382	3.3913	IFI30
cellular response to transforming growth factor beta stimulus (GO:0071560)	1/101	0.127842	0.184815	0.125986	0.181147	-1.7281	3.55464	JUN
small GTPase mediated signal transduction (GO:0007264)	1/100	0.126657	0.184815	0.124827	0.181147	-1.52967	3.16072	JUN
cellular response to metal ion (GO:0071248)	1/101	0.127842	0.184815	0.125986	0.181147	-1.17172	2.41018	JUN
positive regulation of angiogenesis (GO:0045766)	1/104	0.131387	0.188914	0.129453	0.185132	-1.3858	2.81262	CD40
positive regulation of vasculature development (GO:1904018)	1/105	0.132566	0.189584	0.130606	0.185782	-1.81787	3.67333	CD40
response to endoplasmic reticulum stress (GO:0034976)	1/107	0.134919	0.190978	0.132908	0.18731	-1.15354	2.31064	JUN
regulation of transcription from RNA polymerase II promoter (GO:0006357)	4/1479	0.134977	0.190978	0.123359	0.180744	-1.15097	2.30499	CD40;JUN;SLC11A1;ARID5A
cellular response to starvation (GO:0009267)	1/108	0.136093	0.191539	0.134056	0.187678	-1.11742	2.2286	GAS2L1
regulation of cytokine production (GO:0001817)	1/109	0.137266	0.192172	0.135203	0.188293	-1.13212	2.2482	SLC11A1
cellular protein metabolic process (GO:0044267)	2/485	0.138676	0.19313	0.133089	0.18731	-1.02152	2.01813	QSOX1;IGFBP7
cellular response to oxidative stress (GO:0034599)	1/116	0.145431	0.195947	0.143193	0.192921	-1.76803	3.40885	JUN
epithelium development (GO:0060429)	1/116	0.145431	0.195947	0.143193	0.192921	-1.72311	3.32224	TAGLN2
positive regulation of kinase activity (GO:0033674)	1/114	0.143106	0.195947	0.140917	0.192921	-1.66833	3.24352	RASSF2
cellular response to interferon-gamma (GO:0071346)	1/117	0.146592	0.195947	0.144328	0.192921	-1.67201	3.21043	IFI30
regulation of macroautophagy (GO:0016241)	1/117	0.146592	0.195947	0.144328	0.192921	-1.49903	2.8783	QSOX1
positive regulation of developmental process (GO:0051094)	1/114	0.143106	0.195947	0.140917	0.192921	-1.263	2.45548	JUN
positive regulation of peptidyl-tyrosine phosphorylation (GO:0050731)	1/117	0.146592	0.195947	0.144328	0.192921	-1.1326	2.17471	CD40
sphingolipid metabolic process (GO:0006665)	1/117	0.146592	0.195947	0.144328	0.192921	-1.12776	2.16542	GM2A
positive regulation of protein serine/threonine kinase activity (GO:0071902)	1/119	0.148908	0.198048	0.146595	0.194002	-1.67143	3.18311	CD40
regulation of cell differentiation (GO:0045595)	1/122	0.152371	0.199659	0.149985	0.196532	-1.68073	3.16219	JUN
macromolecular complex assembly (GO:0065003)	1/121	0.151218	0.199659	0.148857	0.196019	-1.16751	2.20547	CD40
negative regulation of cellular macromolecule biosynthetic process (GO:2000113)	2/513	0.15172	0.199659	0.145702	0.193784	-0.915787	1.72692	JUN;ARID5A
tumor necrosis factor-mediated signaling pathway (GO:0033209)	1/124	0.154672	0.200696	0.152238	0.197538	-1.15326	2.15251	CD40
cellular calcium ion homeostasis (GO:0006874)	1/124	0.154672	0.200696	0.152238	0.197538	-1.11452	2.0802	CD40
negative regulation of multicellular organismal process (GO:0051241)	1/126	0.156967	0.202686	0.154485	0.199481	-1.00447	1.86	SLC11A1
G2/M transition of mitotic cell cycle (GO:0000086)	1/127	0.158113	0.203178	0.155607	0.199958	-1.16411	2.14713	ABCB1
cell cycle G2/M phase transition (GO:0044839)	1/128	0.159256	0.203664	0.156727	0.200429	-1.54431	2.83727	ABCB1
positive regulation of NF-kappaB transcription factor activity (GO:0051092)	1/129	0.160399	0.204144	0.157845	0.200894	-1.12831	2.0649	CD40
cellular response to organic substance (GO:0071310)	1/134	0.166088	0.210378	0.163417	0.206995	-1.00377	1.802	JUN
phagocytosis (GO:0006909)	1/136	0.168353	0.212237	0.165636	0.208812	-1.64479	2.9305	SLC11A1
muscle contraction (GO:0006936)	1/138	0.170612	0.21407	0.16785	0.210604	-1.03054	1.82237	VIM
inorganic cation transmembrane transport (GO:0098662)	1/141	0.17399	0.217284	0.17116	0.21275	-1.09648	1.91747	SLC11A1
positive regulation of macromolecule biosynthetic process (GO:0010557)	1/143	0.176235	0.219054	0.173359	0.214482	-1.28009	2.22215	VIM
negative regulation of transcription from RNA polymerase II promoter (GO:0000122)	2/566	0.177055	0.219054	0.170259	0.212624	-0.916776	1.58721	JUN;ARID5A
transmembrane receptor protein serine/threonine kinase signaling pathway (GO:0007178)	1/145	0.178474	0.219787	0.175553	0.216191	-1.78816	3.08156	JUN
regulation of protein kinase activity (GO:0045859)	1/148	0.181821	0.222877	0.178834	0.219216	-1.18038	2.01223	RASSF2
protein stabilization (GO:0050821)	1/153	0.18737	0.228626	0.184274	0.223822	-1.0734	1.79759	RASSF2
spermatogenesis (GO:0007283)	1/154	0.188476	0.228925	0.185358	0.224115	-1.16117	1.93775	HSPA2
male gamete generation (GO:0048232)	1/155	0.18958	0.229219	0.186441	0.224404	-0.994139	1.6532	HSPA2
positive regulation of transcription, DNA-templated (GO:0045893)	3/1121	0.190737	0.229575	0.179928	0.219545	-1.35916	2.25193	CD40;JUN;SLC11A1
positive regulation of cellular biosynthetic process (GO:0031328)	1/160	0.195078	0.233742	0.191834	0.229855	-1.59788	2.6115	VIM
positive regulation of I-kappaB kinase/NF-kappaB signaling (GO:0043123)	1/164	0.199451	0.236848	0.196123	0.231862	-1.17244	1.89019	CD40
positive regulation of protein modification process (GO:0031401)	1/164	0.199451	0.236848	0.196123	0.231862	-0.925285	1.49173	CD40
negative regulation of gene expression (GO:0010629)	2/619	0.203048	0.240048	0.195527	0.231862	-1.03662	1.65269	JUN;ARID5A
positive regulation of hydrolase activity (GO:0051345)	1/173	0.209207	0.246235	0.205697	0.242103	-1.43962	2.25219	CD40
regulation of angiogenesis (GO:0045765)	1/178	0.214577	0.25034	0.210968	0.24613	-1.47306	2.26717	CD40
positive regulation of MAP kinase activity (GO:0043406)	1/178	0.214577	0.25034	0.210968	0.24613	-1.25017	1.92412	CD40
negative regulation of protein phosphorylation (GO:0001933)	1/179	0.215647	0.25049	0.212019	0.246275	-1.0875	1.66834	RASSF2
Fc-epsilon receptor signaling pathway (GO:0038095)	1/183	0.219913	0.254334	0.216207	0.250048	-1.0584	1.60297	JUN
Fc receptor signaling pathway (GO:0038093)	1/184	0.220976	0.254457	0.217251	0.250167	-1.15171	1.73874	JUN
regulation of GTPase activity (GO:0043087)	1/189	0.226269	0.259429	0.22245	0.25505	-1.065	1.58262	CD40
positive regulation of GTPase activity (GO:0043547)	1/193	0.230479	0.263121	0.226585	0.258677	-1.04059	1.52717	CD40
cellular response to tumor necrosis factor (GO:0071356)	1/195	0.232575	0.263255	0.228645	0.258807	-1.08711	1.58559	CD40
positive regulation of cell differentiation (GO:0045597)	1/195	0.232575	0.263255	0.228645	0.258807	-1.05682	1.54141	JUN
positive regulation of multicellular organismal process (GO:0051240)	1/203	0.240907	0.27153	0.236833	0.266939	-1.40472	1.9994	SLC11A1
regulation of MAPK cascade (GO:0043408)	1/204	0.241942	0.271547	0.237851	0.266955	-1.17522	1.66771	CD40
regulation of I-kappaB kinase/NF-kappaB signaling (GO:0043122)	1/205	0.242976	0.271561	0.238867	0.266969	-1.09877	1.55453	CD40
positive regulation of phosphorylation (GO:0042327)	1/209	0.247098	0.275013	0.24292	0.270363	-1.53942	2.15206	CD40
regulation of translation (GO:0006417)	1/214	0.25222	0.279476	0.247957	0.274753	-1.28681	1.77252	VIM
positive regulation of sequence-specific DNA binding transcription factor activity (GO:0051091)	1/216	0.25426	0.279476	0.249963	0.274753	-1.09955	1.50572	CD40
regulation of cell cycle (GO:0051726)	1/216	0.25426	0.279476	0.249963	0.274753	-1.09875	1.50463	JUN
positive regulation of cytokine production (GO:0001819)	1/221	0.259335	0.28382	0.254956	0.279029	-1.6008	2.1605	SLC11A1
mitotic cell cycle phase transition (GO:0044772)	1/222	0.260346	0.28382	0.255951	0.279029	-0.99332	1.33675	ABCB1
Ras protein signal transduction (GO:0007265)	1/224	0.262364	0.284853	0.257937	0.280046	-1.12995	1.51189	JUN
activation of protein kinase activity (GO:0032147)	1/234	0.272376	0.29452	0.267791	0.289562	-1.06566	1.38597	SLC11A1
defense response to bacterium (GO:0042742)	1/242	0.280291	0.301851	0.275585	0.296783	-1.32974	1.69134	SLC11A1
regulation of immune response (GO:0050776)	1/252	0.290068	0.311121	0.285216	0.305917	-1.0656	1.31883	CD40
endocytosis (GO:0006897)	1/264	0.301631	0.319657	0.296614	0.31434	-1.3985	1.67617	SLC11A1
negative regulation of transcription, DNA-templated (GO:0045892)	2/814	0.301295	0.319657	0.291692	0.311607	-1.3494	1.61882	JUN;ARID5A
regulation of protein phosphorylation (GO:0001932)	1/262	0.299717	0.319657	0.294727	0.313589	-0.992837	1.19629	CD40
regulation of programmed cell death (GO:0043067)	1/269	0.306396	0.323418	0.301312	0.318052	-1.02695	1.21475	CD40
cellular response to oxygen-containing compound (GO:1901701)	1/275	0.312072	0.328107	0.306911	0.322681	-0.988925	1.15163	JUN
positive regulation of macromolecule metabolic process (GO:0010604)	1/277	0.313954	0.328786	0.308767	0.323355	-1.45724	1.68822	SLC11A1
positive regulation of MAPK cascade (GO:0043410)	1/290	0.326067	0.340133	0.320722	0.334557	-0.923873	1.03534	CD40
negative regulation of cell proliferation (GO:0008285)	1/364	0.391192	0.406473	0.385124	0.398611	-1.46602	1.37595	IGFBP7
cellular protein modification process (GO:0006464)	2/1002	0.394951	0.408782	0.384301	0.398611	-1.37288	1.2754	QSOX1;IGFBP7
vesicle-mediated transport (GO:0016192)	1/411	0.429361	0.442675	0.422977	0.436093	-1.30259	1.10128	HSPA2
nervous system development (GO:0007399)	1/456	0.46374	0.4752	0.457142	0.468446	-1.07622	0.827001	NFASC
cellular response to cytokine stimulus (GO:0071345)	1/457	0.464481	0.4752	0.457879	0.468446	-0.926943	0.710813	VIM
positive regulation of intracellular signal transduction (GO:1902533)	1/480	0.481251	0.49047	0.474571	0.483662	-1.22537	0.896193	CD40
positive regulation of nucleic acid-templated transcription (GO:1903508)	1/503	0.497514	0.50511	0.490775	0.498268	-1.51608	1.05842	JUN
positive regulation of cellular process (GO:0048522)	1/520	0.509218	0.515027	0.502446	0.508177	-1.09963	0.742115	JUN
negative regulation of cellular process (GO:0048523)	1/535	0.519327	0.523262	0.512533	0.516416	-1.12381	0.736347	IGFBP7
regulation of transcription, DNA-templated (GO:0006355)	2/1599	0.647441	0.649884	0.638417	0.640826	-1.36568	0.593701	JUN;ARID5A
regulation of gene expression (GO:0010468)	1/1038	0.763057	0.763057	0.757918	0.757918	-1.43513	0.388092	SLC11A1

## Sheet: UP_KEGG-pathway
Term	Overlap	P-value	Adjusted P-value	Old P-value	Old Adjusted P-value	Z-score	Combined Score	Genes
Antigen processing and presentation	3/77	0.000150157	0.0060063	0.000274404	0.0109762	-21.2255	186.866	TAP1;HSPA2;IFI30
Epstein-Barr virus infection	4/201	0.00014496	0.0060063	0.000272965	0.0109762	-0.615195	5.43774	CD40;JUN;TAP1;VIM
Primary immunodeficiency	2/37	0.00113531	0.0302749	0.00182834	0.0487557	-11.3636	77.0548	CD40;TAP1
ABC transporters	2/45	0.00167643	0.0335286	0.00264731	0.0529462	-12.4472	79.551	ABCB1;TAP1
Toll-like receptor signaling pathway	2/104	0.00863638	0.130185	0.0128951	0.191435	-52.0553	247.355	CD40;JUN
Toxoplasmosis	2/113	0.010128	0.130185	0.0150616	0.191435	-38.0345	174.672	CD40;HSPA2
Cell adhesion molecules (CAMs)	2/145	0.0162731	0.130185	0.0239294	0.191435	-8.02454	33.047	CD40;NFASC
Measles	2/138	0.0148201	0.130185	0.0218398	0.191435	-7.69313	32.4017	JUN;HSPA2
Estrogen signaling pathway	2/137	0.0146173	0.130185	0.0215479	0.191435	-3.1236	13.1989	JUN;HSPA2
Lysosome	2/123	0.0119096	0.130185	0.0176415	0.191435	-2.47333	10.9578	GM2A;SLC11A1
Influenza A	2/171	0.0221754	0.161276	0.0323799	0.23549	-2.46583	9.39177	JUN;HSPA2
Human T-cell leukemia virus 1 infection	2/219	0.0350091	0.215441	0.0505876	0.266384	-8.98303	30.1125	CD40;JUN
Human immunodeficiency virus 1 infection	2/212	0.032991	0.215441	0.0477375	0.266384	-6.782	23.1369	JUN;TAP1
Asthma	1/31	0.0410437	0.217156	0.0519816	0.266384	-82.22	262.538	CD40
Intestinal immune network for IgA production	1/48	0.0628577	0.217156	0.078571	0.266384	-93.4664	258.61	CD40
Legionellosis	1/55	0.0717004	0.217156	0.0893181	0.266384	-81.6131	215.072	HSPA2
Autoimmune thyroid disease	1/53	0.0691821	0.217156	0.0862594	0.266384	-74.9948	200.312	CD40
Salmonella infection	1/86	0.109904	0.217156	0.135536	0.266384	-88.34	195.068	JUN
Renal cell carcinoma	1/69	0.0891453	0.217156	0.110466	0.266384	-80.6896	195.066	JUN
Cocaine addiction	1/49	0.0641259	0.217156	0.0801134	0.266384	-66.8197	183.547	JUN
Allograft rejection	1/38	0.0500845	0.217156	0.0630148	0.266384	-52.1845	156.243	CD40
Inflammatory bowel disease (IBD)	1/65	0.0841935	0.217156	0.104471	0.266384	-39.6914	98.2218	JUN
Colorectal cancer	1/86	0.109904	0.217156	0.135536	0.266384	-40.5904	89.6296	JUN
TNF signaling pathway	1/110	0.138437	0.217156	0.16982	0.266384	-44.0888	87.1786	JUN
Staphylococcus aureus infection	1/68	0.0879098	0.217156	0.108971	0.266384	-33.9489	82.545	CFD
Th17 cell differentiation	1/107	0.134919	0.217156	0.165604	0.266384	-37.5102	75.1358	JUN
Complement and coagulation cascades	1/79	0.101412	0.217156	0.125293	0.266384	-31.3544	71.7564	CFD
Rheumatoid arthritis	1/91	0.115923	0.217156	0.142785	0.266384	-29.4525	63.4653	JUN
Viral myocarditis	1/59	0.0767172	0.217156	0.0954073	0.266384	-22.5627	57.9327	CD40
Malaria	1/49	0.0641259	0.217156	0.0801134	0.266384	-19.1962	52.7302	CD40
IL-17 signaling pathway	1/93	0.118319	0.217156	0.145668	0.266384	-19.803	42.2669	JUN
Bile secretion	1/72	0.0928422	0.217156	0.114938	0.266384	-16.5113	39.2451	ABCB1
NF-kappa B signaling pathway	1/95	0.120709	0.217156	0.148543	0.266384	-17.8359	37.7116	CD40
Th1 and Th2 cell differentiation	1/92	0.117122	0.217156	0.144227	0.266384	-17.2262	36.9423	JUN
GnRH signaling pathway	1/93	0.118319	0.217156	0.145668	0.266384	-13.5614	28.945	JUN
Mitophagy	1/65	0.0841935	0.217156	0.104471	0.266384	-11.4208	28.2623	JUN
B cell receptor signaling pathway	1/71	0.0916115	0.217156	0.11345	0.266384	-11.2737	26.9465	JUN
Amphetamine addiction	1/68	0.0879098	0.217156	0.108971	0.266384	-10.7315	26.0931	JUN
T cell receptor signaling pathway	1/101	0.127842	0.217156	0.157113	0.266384	-12.3651	25.4344	JUN
Pertussis	1/76	0.0977489	0.217156	0.120869	0.266384	-9.18103	21.3491	JUN
ErbB signaling pathway	1/85	0.108696	0.217156	0.13408	0.266384	-9.59904	21.3022	JUN
Leishmaniasis	1/74	0.0952988	0.217156	0.117908	0.266384	-8.64357	20.3188	JUN
Chagas disease (American trypanosomiasis)	1/103	0.130207	0.217156	0.159952	0.266384	-8.56464	17.4601	JUN
C-type lectin receptor signaling pathway	1/104	0.131387	0.217156	0.161369	0.266384	-7.83712	15.9062	JUN
Epithelial cell signaling in Helicobacter pylori infection	1/68	0.0879098	0.217156	0.108971	0.266384	-5.69118	13.8378	JUN
Choline metabolism in cancer	1/99	0.125471	0.217156	0.154265	0.266384	-5.75516	11.9459	JUN
Drug metabolism	1/108	0.136093	0.217156	0.167012	0.266384	-5.31175	10.5938	IMPDH2
AGE-RAGE signaling pathway in diabetic complications	1/100	0.126657	0.217156	0.155691	0.266384	-4.33133	8.94971	JUN
Longevity regulating pathway	1/102	0.129025	0.217156	0.158534	0.266384	-3.399	6.96029	HSPA2
MicroRNAs in cancer	2/299	0.0611967	0.217156	0.087204	0.266384	15.9832	-44.6516	ABCB1;VIM
MAPK signaling pathway	2/295	0.0597624	0.217156	0.0852145	0.266384	15.9832	-45.0307	JUN;HSPA2
Neurotrophin signaling pathway	1/119	0.148908	0.229089	0.18235	0.280538	-9.52655	18.1426	JUN
Osteoclast differentiation	1/127	0.158113	0.233106	0.19334	0.284695	-3.24237	5.98039	JUN
Purine metabolism	1/129	0.160399	0.233106	0.196066	0.284695	-3.1872	5.83287	IMPDH2
Systemic lupus erythematosus	1/133	0.164953	0.233106	0.201493	0.284695	-2.2884	4.12391	CD40
Spliceosome	1/134	0.166088	0.233106	0.202845	0.284695	-1.56436	2.8084	HSPA2
Relaxin signaling pathway	1/130	0.161539	0.233106	0.197426	0.284695	-1.09171	1.9902	JUN
Breast cancer	1/147	0.180707	0.234213	0.220223	0.285156	-2.33299	3.99147	JUN
Apoptosis	1/143	0.176235	0.234213	0.214913	0.285156	-1.33702	2.32098	JUN
Fluid shear stress and atherosclerosis	1/139	0.17174	0.234213	0.209571	0.285156	-1.00025	1.76221	JUN
Gastric cancer	1/149	0.182934	0.234213	0.222865	0.285156	0.946797	-1.60826	ABCB1
Non-alcoholic fatty liver disease (NAFLD)	1/149	0.182934	0.234213	0.222865	0.285156	1.02419	-1.73972	JUN
Oxytocin signaling pathway	1/153	0.18737	0.234213	0.228125	0.285156	7.88134	-13.1986	JUN
Phagosome	1/152	0.186263	0.234213	0.226813	0.285156	21.4461	-36.0422	TAP1
Hepatitis B	1/163	0.19836	0.235931	0.241131	0.286715	0.917198	-1.48372	JUN
Hippo signaling pathway	1/160	0.195078	0.235931	0.237251	0.286715	1.01927	-1.66586	RASSF2
Wnt signaling pathway	1/158	0.192883	0.235931	0.234653	0.286715	3.45152	-5.68006	JUN
Protein processing in endoplasmic reticulum	1/165	0.200541	0.235931	0.243708	0.286715	11.3364	-18.2146	HSPA2
Tight junction	1/170	0.205968	0.238803	0.250114	0.289988	4.4556	-7.03999	JUN
NOD-like receptor signaling pathway	1/178	0.214577	0.245231	0.260261	0.297441	14.2979	-22.0056	JUN
Kaposi sarcoma-associated herpesvirus infection	1/186	0.223097	0.247886	0.270281	0.300312	1.7517	-2.62781	JUN
Transcriptional misregulation in cancer	1/186	0.223097	0.247886	0.270281	0.300312	7.56102	-11.3427	CD40
Focal adhesion	1/199	0.236752	0.258197	0.286296	0.312142	1.64574	-2.37109	JUN
Viral carcinogenesis	1/201	0.238832	0.258197	0.288731	0.312142	6.10655	-8.74455	JUN
cAMP signaling pathway	1/212	0.250175	0.266854	0.301986	0.322119	74.2803	-102.922	JUN
Human cytomegalovirus infection	1/225	0.263371	0.277233	0.317358	0.334061	71.7341	-95.7069	TAP1
Endocytosis	1/244	0.282256	0.293253	0.339262	0.35248	83.9168	-106.15	HSPA2
Cytokine-cytokine receptor interaction	1/294	0.329752	0.338208	0.393843	0.403942	142.008	-157.546	CD40
Herpes simplex virus 1 infection	1/492	0.489798	0.495998	0.571632	0.578867	257.859	-184.05	TAP1
Pathways in cancer	1/530	0.51598	0.51598	0.599672	0.599672	264.559	-175.056	JUN

## Sheet: Down All
Id	Gene	Treat_1_1	Treat_1_2	Treat_1_3	Treat_2_4	Treat_2_5	Treat_2_6	Treat_3_7	Treat_3_8	Treat_3_9	norm.Treat_1_1	norm.Treat_1_2	norm.Treat_1_3	norm.Treat_2_4	norm.Treat_2_5	norm.Treat_2_6	norm.Treat_3_7	norm.Treat_3_8	norm.Treat_3_9	baseMean	Treat1	Treat2	Treat3	FoldChange	log2FoldChange	pvalue	padj	dispGeneEst	dispFit	dispMAP	dispersion	betaConv	maxCooks
ENSGALG00000026263	ensembl	46	90	122	133	195	76	15	21	15	46	92	122	134	202	73	14	20	15	79.81	87	136	16	0.12	-3.06	3.99766e-09	2.10172e-05	0.1681	0.1567	0.1619	0.1619	TRUE	0.0479
ENSGALG00000032836	ensembl	272	232	131	205	176	99	58	21	28	269	236	132	207	183	95	53	20	28	135.85	212	162	34	0.21	-2.255	4.11119e-07	0.000479029	0.1567	0.1035	0.1256	0.1256	TRUE	0.5581
ENSGALG00000003805	ensembl	110	108	171	178	215	311	54	65	102	109	110	172	180	223	298	49	63	103	145.12	130	234	72	0.306	-1.708	4.26535e-06	0.00260328	0.0809	0.0986	0.0906	0.0906	TRUE	0.2501
ENSGALG00000005524	NTSR1	1441	1001	1612	684	1055	1342	532	327	315	1426	1018	1618	691	1095	1285	483	318	317	916.88	1354	1024	373	0.364	-1.458	1.00773e-07	0.000161451	0.066	0.0389	0.0522	0.0522	TRUE	0.2952
ENSGALG00000011251	TBC1D5	355	257	255	276	266	421	181	51	144	351	261	256	279	276	403	164	50	145	242.87	289	319	120	0.375	-1.417	0.000165929	0.0219437	0.1336	0.0701	0.0964	0.0964	TRUE	1.7809
ENSGALG00000036117	TENT5B	584	425	810	502	1557	1053	549	285	452	578	432	813	507	1616	1008	498	277	455	687.25	608	1044	410	0.393	-1.348	0.00017243	0.0223236	0.1631	0.0427	0.0911	0.0911	TRUE	0.0693
ENSGALG00000009674	CLCN3	678	533	572	548	667	796	451	190	194	671	542	574	554	692	762	409	185	195	509.46	596	669	263	0.393	-1.346	5.62694e-06	0.00290249	0.0774	0.0479	0.0608	0.0608	TRUE	1.7832
ENSGALG00000010554	ensembl	1210	1589	593	1584	1083	2381	583	744	721	1198	1617	595	1601	1124	2280	529	723	726	1154.69	1137	1668	659	0.395	-1.34	3.15467e-05	0.00878988	0.1275	0.0366	0.0736	0.0736	TRUE	0.1625
ENSGALG00000053074	ensembl	2366	2080	2606	1985	2716	3490	1893	741	826	2342	2116	2616	2007	2818	3342	1719	720	831	2056.75	2358	2722	1090	0.4	-1.32	5.47841e-06	0.00290249	0.1073	0.0327	0.0602	0.0602	TRUE	0.6283
ENSGALG00000002466	SLC2A5	2212	1104	2315	996	1821	951	441	398	743	2190	1123	2324	1007	1890	911	400	387	748	1219.85	1879	1269	512	0.403	-1.311	9.76679e-05	0.0160826	0.1529	0.0362	0.0802	0.0802	TRUE	1.4645
ENSGALG00000003103	MST1R	3231	2257	3267	1192	1473	2171	756	726	619	3198	2296	3280	1205	1528	2079	686	705	623	1733.46	2925	1604	671	0.419	-1.256	2.85561e-08	6.28245e-05	0.037	0.0337	0.0359	0.0359	TRUE	0.3082
ENSGALG00000004436	CYP3A4	495	913	462	1239	1054	474	455	409	372	490	929	464	1253	1094	454	413	397	374	651.95	628	934	395	0.423	-1.241	0.00027804	0.0297026	0.1372	0.0435	0.0822	0.0822	TRUE	0.5479
ENSGALG00000014907	DCBLD1	1153	721	816	172	263	330	143	74	123	1141	734	819	174	273	316	130	72	124	420.26	898	254	109	0.427	-1.228	6.46563e-05	0.012556	0.0744	0.0522	0.0617	0.0617	TRUE	0.3112
ENSGALG00000023454	C9ORF152	263	313	410	240	481	412	133	188	188	260	318	412	243	499	394	121	183	189	291.02	330	379	164	0.433	-1.207	0.000149085	0.0209981	0.0754	0.0631	0.0687	0.0687	TRUE	0.1227
ENSGALG00000042446	ACSM5	2407	2735	3563	2534	3091	4341	1150	1200	2080	2383	2782	3577	2562	3207	4157	1044	1166	2093	2552.32	2914	3309	1434	0.433	-1.206	8.738e-06	0.00329397	0.0868	0.0318	0.0525	0.0525	TRUE	0.403
ENSGALG00000011285	ensembl	998	796	765	587	1418	1201	535	550	377	988	810	768	593	1471	1150	486	534	379	797.77	855	1071	466	0.435	-1.2	3.15464e-05	0.00878988	0.0813	0.0406	0.0584	0.0584	TRUE	0.1504
ENSGALG00000016324	GSTA4L	4385	4346	4471	2437	3882	4086	1734	1759	1288	4341	4421	4488	2464	4028	3912	1574	1709	1296	3137.12	4417	3468	1526	0.44	-1.184	1.11931e-08	3.58654e-05	0.0269	0.031	0.0305	0.0305	TRUE	0.5204
ENSGALG00000008608	FETUB	9012	6072	11907	7786	11638	8414	3725	5202	3890	8921	6177	11953	7871	12076	8056	3382	5053	3915	7489.55	9017	9334	4117	0.441	-1.181	3.17895e-06	0.00214445	0.0699	0.0291	0.0461	0.0461	TRUE	0.0968
ENSGALG00000016761	LYG2	305	344	263	466	322	256	124	194	178	302	350	264	471	334	245	113	188	179	271.83	305	350	160	0.457	-1.13	0.000247919	0.0288871	0.0623	0.0656	0.0641	0.0641	TRUE	0.1371
ENSGALG00000029435	CYP7B1	425	340	495	507	629	703	470	222	215	421	346	497	513	653	673	427	216	216	440.07	421	613	286	0.467	-1.097	0.000167784	0.0219437	0.0681	0.0511	0.0588	0.0588	TRUE	1.0072
ENSGALG00000048876	LEAP2	3046	2697	4144	2119	3315	2344	1468	1454	917	3015	2744	4160	2142	3440	2244	1333	1412	923	2379.3	3306	2609	1223	0.469	-1.093	8.07487e-06	0.00323424	0.0574	0.0321	0.0426	0.0426	TRUE	0.6279
ENSGALG00000005439	ACACA	23931	13699	27936	6998	12538	14029	5605	5644	5284	23689	13937	28045	7074	13010	13433	5089	5483	5318	12786.4	21890	11172	5297	0.474	-1.077	4.85107e-05	0.010558	0.0704	0.0285	0.0505	0.0505	TRUE	0.1421
ENSGALG00000003149	ensembl	398	299	380	309	382	385	187	192	161	394	304	381	312	396	369	170	187	162	297.26	360	359	173	0.481	-1.055	6.81407e-06	0.00301158	0.0103	0.0623	0.0355	0.0355	TRUE	0.1397
ENSGALG00000012412	MTHFD1L	852	673	708	707	722	1713	415	584	548	843	685	711	715	749	1640	377	567	552	759.84	746	1035	499	0.482	-1.054	0.00049039	0.0442398	0.0951	0.0413	0.0644	0.0644	TRUE	2.0925
ENSGALG00000002165	UNC13B	414	276	306	368	358	299	183	178	163	410	281	307	372	371	286	166	173	164	281.19	333	343	168	0.489	-1.033	3.87993e-05	0.00994583	0.0187	0.0643	0.0411	0.0411	TRUE	0.3137
ENSGALG00000001697	ensembl	25746	22665	23489	21190	36066	39219	21673	14180	13831	25486	23058	23581	21421	37425	37552	19676	13775	13920	23988.3	24042	32133	15790	0.491	-1.025	5.63976e-06	0.00290249	0.0438	0.0282	0.0367	0.0367	TRUE	0.694
ENSGALG00000030719	CLMN	766	505	659	510	646	839	330	311	391	758	514	662	516	670	803	300	302	394	546.45	645	663	332	0.5	-1	4.56057e-05	0.010558	0.0335	0.0466	0.0411	0.0411	TRUE	0.1027
ENSGALG00000043193	TAF2	818	764	825	486	594	760	368	260	338	810	777	828	491	616	728	334	253	340	575.27	805	612	309	0.505	-0.986	7.80331e-06	0.00322629	0.0195	0.0456	0.0327	0.0327	TRUE	0.1271
ENSGALG00000012973	ESR1	324	262	398	593	521	641	368	268	294	321	267	400	599	541	614	334	260	296	403.45	329	585	297	0.508	-0.978	1.87723e-05	0.00601511	0.0163	0.0532	0.0352	0.0352	TRUE	0.2674
ENSGALG00000042771	GBE1	3788	2659	2669	2289	3187	4150	1546	1654	1918	3750	2705	2679	2314	3307	3974	1404	1607	1930	2629.96	3045	3198	1647	0.515	-0.958	3.1274e-05	0.00878988	0.0442	0.0316	0.0377	0.0377	TRUE	0.1459
ENSGALG00000016205	PDXK	752	509	680	679	778	1129	637	413	366	744	518	683	686	807	1081	578	401	368	651.94	648	858	449	0.524	-0.933	0.000252792	0.0289288	0.048	0.0435	0.0452	0.0452	TRUE	0.2922
ENSGALG00000003705	VPS13C	1104	842	1072	1144	1335	1735	966	676	663	1093	857	1076	1156	1385	1661	877	657	667	1047.74	1009	1401	734	0.524	-0.933	1.05741e-05	0.00379476	0.0246	0.0375	0.0313	0.0313	TRUE	0.098
ENSGALG00000001863	VTG2	2521923	2658014	2517167	1700770	2312730	2268375	1428686	1007733	1049417	2496431	2704127	2526996	1719323	2399861	2171968	1297043	978965	1056205	1.92788e+06	2575851	2097051	1110738	0.53	-0.917	1.96479e-07	0.000279808	0.0172	0.0277	0.0224	0.0224	TRUE	0.2028
ENSGALG00000001320	CYP1A2	3438	3998	4437	2756	1856	1819	942	1077	1539	3403	4067	4454	2786	1926	1742	855	1046	1549	2425.45	3975	2151	1150	0.535	-0.904	0.000241625	0.028675	0.0599	0.032	0.043	0.043	TRUE	0.5736
ENSGALG00000005470	PLPPR5	1053	1467	1163	756	938	1162	661	403	535	1042	1492	1168	764	973	1113	600	391	538	898.07	1234	950	510	0.537	-0.897	0.000133788	0.0197099	0.036	0.0392	0.0383	0.0383	TRUE	0.2708
ENSGALG00000016491	APOB	769775	658996	895186	620702	823337	1062670	555994	419603	428844	761994	670429	898681	627473	854356	1017506	504763	407625	431618	686049	777035	833112	448002	0.538	-0.895	8.43503e-06	0.00327611	0.03	0.0277	0.0291	0.0291	TRUE	0.132
ENSGALG00000053358	ensembl	593	554	667	749	929	777	608	340	459	587	564	670	757	964	744	552	330	462	625.51	607	822	448	0.545	-0.874	0.000163045	0.0219437	0.0284	0.0442	0.0371	0.0371	TRUE	0.4037
ENSGALG00000039354	VTG1	1222075	1197392	1256385	1097586	1249426	1682581	863226	640553	793108	1209722	1218165	1261291	1109559	1296498	1611070	783686	622267	798238	1.10117e+06	1229726	1339042	734730	0.549	-0.866	1.14646e-06	0.000918387	0.018	0.0277	0.0228	0.0228	TRUE	0.1755
ENSGALG00000011805	ensembl	1915	2721	2222	3723	4475	4602	2568	1978	2896	1896	2768	2231	3764	4644	4406	2331	1922	2915	2986.2	2298	4271	2389	0.559	-0.838	5.10986e-05	0.0105634	0.03	0.0312	0.0305	0.0305	TRUE	0.299
ENSGALG00000020160	ADH6	4020	5258	6187	8822	8015	6974	4493	4190	5230	3979	5349	6211	8918	8317	6678	4079	4070	5264	5873.97	5180	7971	4471	0.561	-0.834	4.92149e-05	0.010558	0.0304	0.0295	0.0303	0.0303	TRUE	0.3056
ENSGALG00000053245	ensembl	261741	264913	261705	203762	226409	260467	152258	127375	125439	259095	269509	262727	205985	234939	249397	138229	123739	126250	207763	263777	230107	129406	0.562	-0.83	4.91938e-09	2.10172e-05	0.0044	0.0278	0.0145	0.0145	TRUE	0.0687
ENSGALG00000042374	ensembl	2454	2173	2183	3841	2504	4070	2305	1879	1920	2429	2211	2192	3883	2598	3897	2093	1825	1932	2562.23	2277	3459	1950	0.564	-0.827	1.31466e-05	0.00443422	0.0176	0.0317	0.0256	0.0256	TRUE	0.3842
ENSGALG00000011287	SULT	89604	99057	78208	85597	82863	110544	54053	65233	44272	88698	100776	78513	86531	85985	105846	49072	63371	44558	78150	89329	92787	52334	0.564	-0.826	7.38855e-06	0.00315664	0.0219	0.0279	0.0245	0.0245	TRUE	0.2778
ENSGALG00000006833	ITIH2	29641	31427	30653	40699	39548	51523	28700	23556	25398	29341	31972	30773	41143	41038	49333	26056	22884	25562	33122.4	30695	43838	24834	0.566	-0.82	2.94099e-08	6.28245e-05	0.0061	0.028	0.0157	0.0157	TRUE	0.0982
ENSGALG00000003999	NAV2	1314	1122	1651	1384	1542	1850	1087	1009	731	1301	1141	1657	1399	1600	1771	987	980	736	1285.88	1366	1590	901	0.567	-0.82	8.13025e-05	0.0143227	0.0242	0.0357	0.0303	0.0303	TRUE	0.2781
ENSGALG00000002492	H6PD	852	762	780	965	1296	1048	794	628	552	843	775	783	976	1345	1003	721	610	556	845.77	800	1108	629	0.568	-0.817	4.77908e-05	0.010558	0.0163	0.0399	0.0279	0.0279	TRUE	0.2789
ENSGALG00000010018	CTSEAL	52783	53797	48595	48990	59117	43512	30283	25644	34008	52249	54730	48785	49524	61344	41663	27493	24912	34228	43880.9	51921	50844	28878	0.568	-0.816	1.30736e-05	0.00443422	0.023	0.028	0.0252	0.0252	TRUE	0.1628
ENSGALG00000053043	CARHSP1	1530	1528	1500	557	669	753	369	509	294	1515	1555	1506	563	694	721	335	494	296	853.17	1525	659	375	0.569	-0.814	0.000264832	0.0296189	0.0294	0.0398	0.0338	0.0338	TRUE	0.5933
ENSGALG00000005509	DPYD	1998	1942	2129	1493	1698	2071	1403	848	911	1978	1976	2137	1509	1762	1983	1274	824	917	1595.5	2030	1751	1005	0.574	-0.801	7.83368e-05	0.0141415	0.0244	0.0342	0.0289	0.0289	TRUE	0.4384
ENSGALG00000008845	HAO1	4753	5088	5096	4607	5413	6364	2832	3627	3356	4705	5176	5116	4657	5617	6094	2571	3523	3378	4537.45	4999	5456	3157	0.579	-0.789	1.06586e-05	0.00379476	0.0153	0.03	0.0229	0.0229	TRUE	0.2142
ENSGALG00000001416	ADRA1B	5366	4897	4688	4614	5791	4641	3059	3238	2985	5312	4982	4706	4664	6009	4444	2777	3146	3004	4338.25	5000	5039	2976	0.591	-0.76	6.20898e-06	0.00297681	0.0116	0.0301	0.0201	0.0201	TRUE	0.2304
ENSGALG00000020251	FNIP2	1056	833	913	878	778	1121	583	489	633	1045	847	917	888	807	1073	529	475	637	802.11	936	923	547	0.593	-0.754	0.000214349	0.0256758	0.0167	0.0406	0.0285	0.0285	TRUE	0.1625
ENSGALG00000009320	PSEN1	849	929	917	1599	1452	1740	1223	814	932	840	945	921	1616	1507	1666	1110	791	938	1148.27	902	1596	946	0.593	-0.754	3.39207e-05	0.00905754	0.0102	0.0367	0.023	0.023	TRUE	0.1836
ENSGALG00000013265	GYS2	1773	2110	1955	3021	2823	3127	2023	1815	1784	1755	2147	1963	3054	2929	2994	1837	1763	1796	2248.56	1955	2992	1799	0.601	-0.735	1.07596e-06	0.000918387	0.0029	0.0323	0.0159	0.0159	TRUE	0.0644
ENSGALG00000002182	NR5A2	1886	1720	2083	1576	1859	1974	1325	1137	998	1867	1750	2091	1593	1929	1890	1203	1105	1004	1603.57	1903	1804	1104	0.612	-0.708	3.39175e-05	0.00905754	0.0079	0.0341	0.0203	0.0203	TRUE	0.0842

## Sheet: Down_GO
Term	Overlap	P-value	Adjusted P-value	Old P-value	Old Adjusted P-value	Z-score	Combined Score	Genes
terpenoid metabolic process (GO:0006721)	2/8	0.000131338	0.0239692	0.000211014	0.0339485	-3.12087	27.8935	CYP1A2;CYP3A4
monoterpenoid metabolic process (GO:0016098)	2/7	9.86417e-05	0.0239692	0.000169045	0.0339485	-2.38923	22.0383	CYP1A2;CYP3A4
organic cyclic compound catabolic process (GO:1901361)	2/12	0.000307855	0.0280917	0.000424365	0.0339485	-2.51565	20.3412	CYP1A2;CYP3A4
purine nucleobase metabolic process (GO:0006144)	2/12	0.000307855	0.0280917	0.000424365	0.0339485	-2.28813	18.5015	MTHFD1L;DPYD
steroid catabolic process (GO:0006706)	2/14	0.00042328	0.0286121	0.000558058	0.0339485	-2.34482	18.2133	CYP1A2;CYP3A4
monocarboxylic acid biosynthetic process (GO:0072330)	3/69	0.000470336	0.0286121	0.00052878	0.0339485	-2.02903	15.5465	ACSM5;CYP7B1;ACACA
glucan biosynthetic process (GO:0009250)	2/19	0.000789852	0.0320329	0.00096988	0.039334	-2.34531	16.7541	GYS2;GBE1
glycogen biosynthetic process (GO:0005978)	2/19	0.000789852	0.0320329	0.00096988	0.039334	-1.5275	10.912	GYS2;GBE1
water-soluble vitamin metabolic process (GO:0006767)	3/78	0.000673576	0.0320329	0.000746321	0.0389153	-1.46917	10.7292	PDXK;MTHFD1L;ACACA
lipid catabolic process (GO:0016042)	2/22	0.00106253	0.0352566	0.00126943	0.0419155	-1.93451	13.2458	CYP1A2;CYP3A4
cellular response to hexose stimulus (GO:0071331)	2/22	0.00106253	0.0352566	0.00126943	0.0419155	-1.90356	13.0339	UNC13B;SLC2A5
exogenous drug catabolic process (GO:0042738)	2/24	0.00126597	0.0360904	0.00149068	0.0419155	-2.15083	14.3502	CYP1A2;CYP3A4
drug catabolic process (GO:0042737)	2/25	0.00137414	0.0360904	0.00160772	0.0419155	-1.89717	12.5022	CYP1A2;CYP3A4
steroid metabolic process (GO:0008202)	3/100	0.00138429	0.0360904	0.0014968	0.0419155	-1.74188	11.466	CYP1A2;CYP7B1;CYP3A4
lipid modification (GO:0030258)	2/27	0.00160326	0.0380599	0.00185451	0.0426028	-2.18362	14.0532	PLPPR5;CYP3A4
response to hexose (GO:0009746)	2/28	0.00172417	0.0380599	0.00198424	0.0426028	-1.89493	12.0574	GYS2;SLC2A5
monocarboxylic acid metabolic process (GO:0032787)	3/109	0.00177266	0.0380599	0.0019032	0.0426028	-1.64267	10.4068	MTHFD1L;CYP1A2;ACACA
carboxylic acid metabolic process (GO:0019752)	2/34	0.00253756	0.0487478	0.00285006	0.0542337	-1.65571	9.89543	MTHFD1L;CYP1A2
glycogen metabolic process (GO:0005977)	2/34	0.00253756	0.0487478	0.00285006	0.0542337	-1.65324	9.88066	GYS2;GBE1
negative regulation of response to stimulus (GO:0048585)	3/128	0.00280009	0.0511016	0.00297171	0.0542337	-1.3256	7.792	VPS13C;MST1R;ESR1
acyl-CoA metabolic process (GO:0006637)	2/40	0.00349876	0.0608117	0.00386301	0.0671429	-2.0932	11.8378	ACSM5;ACACA
transcription initiation from RNA polymerase II promoter (GO:0006367)	3/161	0.00532454	0.0791151	0.00557611	0.0848033	-1.80366	9.44295	NR5A2;ESR1;TAF2
organic hydroxy compound biosynthetic process (GO:1901617)	2/50	0.00541884	0.0791151	0.005868	0.0856728	-1.78589	9.31854	PDXK;CYP7B1
response to glucose (GO:0009749)	2/48	0.00500367	0.0791151	0.00543597	0.0848033	-1.70681	9.04197	GYS2;UNC13B
fatty acid biosynthetic process (GO:0006633)	2/48	0.00500367	0.0791151	0.00543597	0.0848033	-1.36026	7.20607	ACSM5;ACACA
coenzyme metabolic process (GO:0006732)	2/52	0.00584932	0.0821154	0.00631527	0.0886566	-2.46322	12.6645	MTHFD1L;ACSM5
cholesterol homeostasis (GO:0042632)	2/59	0.00747453	0.0971848	0.0079988	0.101738	-1.46934	7.19427	CYP7B1;APOB
sterol metabolic process (GO:0016125)	2/60	0.00772153	0.0971848	0.00825408	0.101738	-1.33884	6.51178	CYP7B1;APOB
sterol homeostasis (GO:0055092)	2/59	0.00747453	0.0971848	0.0079988	0.101738	-1.32453	6.48525	CYP7B1;APOB
DNA-templated transcription, initiation (GO:0006352)	3/187	0.00804059	0.0978272	0.00836201	0.101738	-1.31942	6.36392	NR5A2;ESR1;TAF2
cellular amide metabolic process (GO:0043603)	2/63	0.00848441	0.0998971	0.00904172	0.106459	-1.38656	6.61325	MTHFD1L;ACACA
positive regulation of cholesterol storage (GO:0010886)	1/7	0.015301	0.121746	0.0175657	0.128581	-3.79794	15.8748	APOB
lipid hydroxylation (GO:0002933)	1/7	0.015301	0.121746	0.0175657	0.128581	-3.158	13.1999	CYP3A4
aldehyde biosynthetic process (GO:0046184)	1/9	0.0196305	0.121746	0.0219102	0.128581	-3.11074	12.2273	PDXK
positive regulation of protein import into nucleus, translocation (GO:0033160)	1/7	0.015301	0.121746	0.0175657	0.128581	-2.88159	12.0446	PSEN1
purine nucleobase biosynthetic process (GO:0009113)	1/7	0.015301	0.121746	0.0175657	0.128581	-2.86609	11.9798	MTHFD1L
neuron projection maintenance (GO:1990535)	1/7	0.015301	0.121746	0.0175657	0.128581	-2.8435	11.8854	PSEN1
omega-hydroxylase P450 pathway (GO:0097267)	1/10	0.0217883	0.121746	0.0240754	0.128581	-3.08595	11.808	CYP1A2
negative regulation of production of miRNAs involved in gene silencing by miRNA (GO:1903799)	1/8	0.0174681	0.121746	0.0197403	0.128581	-2.8262	11.4387	ESR1
dicarboxylic acid biosynthetic process (GO:0043650)	1/11	0.0239415	0.121746	0.0262361	0.128581	-3.02049	11.2729	MTHFD1L
B cell chemotaxis (GO:0035754)	1/7	0.015301	0.121746	0.0175657	0.128581	-2.60298	10.88	CYP7B1
amyloid precursor protein catabolic process (GO:0042987)	1/9	0.0196305	0.121746	0.0219102	0.128581	-2.70559	10.6348	PSEN1
pyrimidine nucleobase metabolic process (GO:0006206)	1/9	0.0196305	0.121746	0.0219102	0.128581	-2.64965	10.4149	DPYD
positive regulation of RNA polymerase II transcriptional preinitiation complex assembly (GO:0045899)	1/9	0.0196305	0.121746	0.0219102	0.128581	-2.62008	10.2987	ESR1
primary alcohol catabolic process (GO:0034310)	1/11	0.0239415	0.121746	0.0262361	0.128581	-2.7175	10.1421	HAO1
fatty acid alpha-oxidation (GO:0001561)	1/9	0.0196305	0.121746	0.0219102	0.128581	-2.55879	10.0578	HAO1
chylomicron remnant clearance (GO:0034382)	1/8	0.0174681	0.121746	0.0197403	0.128581	-2.44559	9.89824	APOB
chylomicron assembly (GO:0034378)	1/11	0.0239415	0.121746	0.0262361	0.128581	-2.62715	9.80489	APOB
very-low-density lipoprotein particle assembly (GO:0034379)	1/11	0.0239415	0.121746	0.0262361	0.128581	-2.62382	9.79249	APOB
neuron projection organization (GO:0106027)	1/10	0.0217883	0.121746	0.0240754	0.128581	-2.55594	9.78	PSEN1
negative regulation of gene silencing by miRNA (GO:0060965)	1/11	0.0239415	0.121746	0.0262361	0.128581	-2.61791	9.77041	ESR1
chylomicron remodeling (GO:0034371)	1/10	0.0217883	0.121746	0.0240754	0.128581	-2.50444	9.58293	APOB
hepatocyte growth factor receptor signaling pathway (GO:0048012)	1/12	0.02609	0.121746	0.028392	0.128581	-2.62426	9.5686	MST1R
regulation of cholesterol storage (GO:0010885)	1/13	0.0282339	0.121746	0.0305434	0.128581	-2.65553	9.47289	APOB
Notch receptor processing, ligand-dependent (GO:0035333)	1/14	0.0303731	0.121746	0.0326901	0.128581	-2.69221	9.40712	PSEN1
carnitine shuttle (GO:0006853)	1/12	0.02609	0.121746	0.028392	0.128581	-2.57042	9.37229	ACACA
fatty acid transmembrane transport (GO:1902001)	1/12	0.02609	0.121746	0.028392	0.128581	-2.57025	9.37166	ACACA
astrocyte development (GO:0014002)	1/11	0.0239415	0.121746	0.0262361	0.128581	-2.48774	9.28459	PSEN1
pyrimidine nucleoside catabolic process (GO:0046135)	1/12	0.02609	0.121746	0.028392	0.128581	-2.52808	9.21788	DPYD
low-density lipoprotein particle remodeling (GO:0034374)	1/12	0.02609	0.121746	0.028392	0.128581	-2.52626	9.21128	APOB
biotin metabolic process (GO:0006768)	1/12	0.02609	0.121746	0.028392	0.128581	-2.51946	9.18647	ACACA
astrocyte activation (GO:0048143)	1/7	0.015301	0.121746	0.0175657	0.128581	-2.18617	9.13783	PSEN1
vasoconstriction (GO:0042310)	1/13	0.0282339	0.121746	0.0305434	0.128581	-2.53461	9.04153	ADRA1B
tetrahydrofolate metabolic process (GO:0046653)	1/14	0.0303731	0.121746	0.0326901	0.128581	-2.58279	9.02479	MTHFD1L
cellular nitrogen compound catabolic process (GO:0044270)	1/7	0.015301	0.121746	0.0175657	0.128581	-2.13912	8.94117	CYP3A4
amyloid precursor protein metabolic process (GO:0042982)	1/14	0.0303731	0.121746	0.0326901	0.128581	-2.54845	8.90478	PSEN1
acyl-CoA biosynthetic process (GO:0071616)	1/15	0.0325078	0.121746	0.0348323	0.128581	-2.5756	8.8247	ACACA
positive regulation of muscle contraction (GO:0045933)	1/14	0.0303731	0.121746	0.0326901	0.128581	-2.49918	8.73264	ADRA1B
intestinal absorption (GO:0050892)	1/14	0.0303731	0.121746	0.0326901	0.128581	-2.49775	8.72763	SLC2A5
acetyl-CoA metabolic process (GO:0006084)	1/15	0.0325078	0.121746	0.0348323	0.128581	-2.54519	8.72052	ACACA
regulation of phospholipase C activity (GO:1900274)	1/11	0.0239415	0.121746	0.0262361	0.128581	-2.29495	8.56509	ESR1
regulation of RNA polymerase II transcriptional preinitiation complex assembly (GO:0045898)	1/12	0.02609	0.121746	0.028392	0.128581	-2.32002	8.45926	ESR1
regulation of protein import into nucleus, translocation (GO:0033158)	1/13	0.0282339	0.121746	0.0305434	0.128581	-2.32513	8.29429	PSEN1
cellular glucan metabolic process (GO:0006073)	1/13	0.0282339	0.121746	0.0305434	0.128581	-2.29573	8.1894	GBE1
pyrimidine-containing compound catabolic process (GO:0072529)	1/15	0.0325078	0.121746	0.0348323	0.128581	-2.38533	8.17278	DPYD
positive regulation of smooth muscle contraction (GO:0045987)	1/15	0.0325078	0.121746	0.0348323	0.128581	-2.35955	8.08447	ADRA1B
regulation of pH (GO:0006885)	1/11	0.0239415	0.121746	0.0262361	0.128581	-2.15593	8.04625	CLCN3
amyloid-beta metabolic process (GO:0050435)	1/15	0.0325078	0.121746	0.0348323	0.128581	-2.33397	7.99683	PSEN1
positive regulation of protein complex assembly (GO:0031334)	2/89	0.0164099	0.121746	0.0171776	0.128581	-1.92446	7.90929	UNC13B;FNIP2
positive regulation of vasoconstriction (GO:0045907)	1/16	0.0346379	0.121746	0.0369698	0.128581	-2.34786	7.8954	ADRA1B
aromatic compound biosynthetic process (GO:0019438)	1/13	0.0282339	0.121746	0.0305434	0.128581	-2.20722	7.87367	PDXK
intracellular lipid transport (GO:0032365)	1/16	0.0346379	0.121746	0.0369698	0.128581	-2.29864	7.72987	ACACA
nucleoside catabolic process (GO:0009164)	1/13	0.0282339	0.121746	0.0305434	0.128581	-2.15796	7.69794	DPYD
purine-containing compound catabolic process (GO:0072523)	1/15	0.0325078	0.121746	0.0348323	0.128581	-2.23053	7.6424	DPYD
Notch receptor processing (GO:0007220)	1/17	0.0367634	0.121746	0.0391028	0.128581	-2.30318	7.60798	PSEN1
triglyceride-rich lipoprotein particle remodeling (GO:0034370)	1/14	0.0303731	0.121746	0.0326901	0.128581	-2.15463	7.5287	APOB
negative regulation of transcription regulatory region DNA binding (GO:2000678)	1/17	0.0367634	0.121746	0.0391028	0.128581	-2.24961	7.43103	PSEN1
response to ethanol (GO:0045471)	1/15	0.0325078	0.121746	0.0348323	0.128581	-2.11712	7.25384	ADH6
regulation of production of miRNAs involved in gene silencing by miRNA (GO:1903798)	1/14	0.0303731	0.121746	0.0326901	0.128581	-2.07528	7.25143	ESR1
pyrimidine nucleoside metabolic process (GO:0006213)	1/16	0.0346379	0.121746	0.0369698	0.128581	-2.14973	7.22914	DPYD
embryonic cranial skeleton morphogenesis (GO:0048701)	1/16	0.0346379	0.121746	0.0369698	0.128581	-2.10964	7.0943	MTHFD1L
regulation of systemic arterial blood pressure (GO:0003073)	1/13	0.0282339	0.121746	0.0305434	0.128581	-1.97214	7.03507	SLC2A5
regulation of phosphate metabolic process (GO:0019220)	1/15	0.0325078	0.121746	0.0348323	0.128581	-2.05084	7.02674	PSEN1
hexose transport (GO:0008645)	1/17	0.0367634	0.121746	0.0391028	0.128581	-2.12144	7.00765	SLC2A5
regulation of amyloid fibril formation (GO:1905906)	1/9	0.0196305	0.121746	0.0219102	0.128581	-1.77334	6.97041	PSEN1
glucose transmembrane transport (GO:1904659)	1/17	0.0367634	0.121746	0.0391028	0.128581	-2.07407	6.85118	SLC2A5
regulation of Wnt signaling pathway (GO:0030111)	2/110	0.0244033	0.121746	0.0253371	0.128581	-1.83816	6.82515	PSEN1;ESR1
positive regulation of macrophage derived foam cell differentiation (GO:0010744)	1/17	0.0367634	0.121746	0.0391028	0.128581	-2.01569	6.65835	APOB
negative regulation of RNA metabolic process (GO:0051253)	1/16	0.0346379	0.121746	0.0369698	0.128581	-1.97966	6.65721	ESR1
positive regulation of lipid localization (GO:1905954)	1/11	0.0239415	0.121746	0.0262361	0.128581	-1.75013	6.53175	APOB
vitamin D metabolic process (GO:0042359)	1/16	0.0346379	0.121746	0.0369698	0.128581	-1.87984	6.32153	CYP3A4
lipid biosynthetic process (GO:0008610)	2/73	0.0112594	0.121746	0.0118985	0.128581	-1.37287	6.15943	ACSM5;ACACA
positive regulation of cellular metabolic process (GO:0031325)	2/93	0.0178279	0.121746	0.0186275	0.128581	-1.51177	6.0879	TBC1D5;ACACA
protein localization to chromatin (GO:0071168)	1/17	0.0367634	0.121746	0.0391028	0.128581	-1.49032	4.92292	ESR1
fatty acid metabolic process (GO:0006631)	2/107	0.0231802	0.121746	0.0240904	0.128581	-1.29254	4.86573	ACSM5;ACACA
cytosolic transport (GO:0016482)	2/119	0.0282273	0.121746	0.0292315	0.128581	-1.3383	4.77434	TBC1D5;VPS13C
phospholipase C-activating G-protein coupled receptor signaling pathway (GO:0007200)	2/92	0.0174686	0.121746	0.0182603	0.128581	-1.17937	4.77334	ADRA1B;ESR1
regulation of phosphorylation (GO:0042325)	2/120	0.0286662	0.121746	0.0296782	0.128581	-1.16892	4.15203	PSEN1;FNIP2
positive regulation of cytosolic calcium ion concentration (GO:0007204)	2/134	0.0350938	0.121746	0.0362149	0.128581	-1.21834	4.08111	ADRA1B;ESR1
positive regulation of protein kinase B signaling (GO:0051897)	2/128	0.0322754	0.121746	0.0333498	0.128581	-1.15018	3.94908	MST1R;ESR1
regulation of cytosolic calcium ion concentration (GO:0051480)	2/138	0.0370242	0.121746	0.0381764	0.128581	-1.07212	3.53389	ADRA1B;ESR1
embryo development ending in birth or egg hatching (GO:0009792)	1/18	0.0388843	0.1256	0.0412312	0.13318	-2.05102	6.65999	NR5A2
positive regulation of transcription initiation from RNA polymerase II promoter (GO:0060261)	1/18	0.0388843	0.1256	0.0412312	0.13318	-1.93965	6.29837	ESR1
hexose transmembrane transport (GO:0035428)	1/20	0.0431125	0.126963	0.0454742	0.133384	-2.49206	7.83488	SLC2A5
endoplasmic reticulum calcium ion homeostasis (GO:0032469)	1/19	0.0410007	0.126963	0.043355	0.133384	-2.37616	7.58986	PSEN1
Golgi to endosome transport (GO:0006895)	1/21	0.0452197	0.126963	0.0475889	0.133384	-2.44084	7.55737	VPS13C
positive regulation of lipid storage (GO:0010884)	1/20	0.0431125	0.126963	0.0454742	0.133384	-2.37081	7.4537	APOB
adenylate cyclase-activating adrenergic receptor signaling pathway (GO:0071880)	1/21	0.0452197	0.126963	0.0475889	0.133384	-2.25601	6.98511	ADRA1B
fatty-acyl-CoA metabolic process (GO:0035337)	1/20	0.0431125	0.126963	0.0454742	0.133384	-2.21726	6.97093	ACACA
positive regulation of metabolic process (GO:0009893)	1/19	0.0410007	0.126963	0.043355	0.133384	-2.17779	6.95622	ACACA
membrane protein ectodomain proteolysis (GO:0006509)	1/19	0.0410007	0.126963	0.043355	0.133384	-2.0177	6.44487	PSEN1
folic acid metabolic process (GO:0046655)	1/20	0.0431125	0.126963	0.0454742	0.133384	-2.0004	6.28915	MTHFD1L
adrenergic receptor signaling pathway (GO:0071875)	1/21	0.0452197	0.126963	0.0475889	0.133384	-2.03012	6.2857	ADRA1B
androgen metabolic process (GO:0008209)	1/21	0.0452197	0.126963	0.0475889	0.133384	-1.9785	6.12586	CYP3A4
neuromuscular junction development (GO:0007528)	1/21	0.0452197	0.126963	0.0475889	0.133384	-1.97813	6.12474	UNC13B
positive regulation of phospholipase activity (GO:0010518)	1/20	0.0431125	0.126963	0.0454742	0.133384	-1.94592	6.11785	ESR1
positive regulation of dendritic spine development (GO:0060999)	1/21	0.0452197	0.126963	0.0475889	0.133384	-1.96669	6.0893	PSEN1
steroid hormone mediated signaling pathway (GO:0043401)	1/21	0.0452197	0.126963	0.0475889	0.133384	-1.90877	5.90997	ESR1
intracellular estrogen receptor signaling pathway (GO:0030520)	1/20	0.0431125	0.126963	0.0454742	0.133384	-1.70968	5.37513	ESR1
cellular response to estradiol stimulus (GO:0071392)	1/21	0.0452197	0.126963	0.0475889	0.133384	-1.38247	4.28045	ESR1
epoxygenase P450 pathway (GO:0019373)	1/22	0.0473225	0.127005	0.0496991	0.133384	-2.01747	6.15483	CYP1A2
energy reserve metabolic process (GO:0006112)	1/22	0.0473225	0.127005	0.0496991	0.133384	-1.89476	5.78049	GBE1
synaptic transmission, glutamatergic (GO:0035249)	1/22	0.0473225	0.127005	0.0496991	0.133384	-1.86442	5.68792	UNC13B
sterol transport (GO:0015918)	1/22	0.0473225	0.127005	0.0496991	0.133384	-1.85389	5.65578	APOB
positive regulation of receptor internalization (GO:0002092)	1/22	0.0473225	0.127005	0.0496991	0.133384	-1.72354	5.25812	TBC1D5
establishment of protein localization to vacuole (GO:0072666)	1/22	0.0473225	0.127005	0.0496991	0.133384	-1.5315	4.67227	VPS13C
regulation of smooth muscle contraction (GO:0006940)	1/24	0.0515143	0.129674	0.0539059	0.135694	-2.18229	6.47244	ADRA1B
glucose transport (GO:0015758)	1/23	0.0494207	0.129674	0.0518048	0.135694	-2.0037	6.02591	SLC2A5
cellular response to amyloid-beta (GO:1904646)	1/24	0.0515143	0.129674	0.0539059	0.135694	-2.02712	6.01222	PSEN1
folic acid-containing compound metabolic process (GO:0006760)	1/24	0.0515143	0.129674	0.0539059	0.135694	-1.9812	5.87604	MTHFD1L
positive regulation of blood circulation (GO:1903524)	1/24	0.0515143	0.129674	0.0539059	0.135694	-1.8442	5.46971	ADRA1B
phospholipid dephosphorylation (GO:0046839)	1/24	0.0515143	0.129674	0.0539059	0.135694	-1.83381	5.4389	PLPPR5
purine-containing compound biosynthetic process (GO:0072522)	1/23	0.0494207	0.129674	0.0518048	0.135694	-1.79094	5.38604	MTHFD1L
protein localization to Golgi apparatus (GO:0034067)	1/24	0.0515143	0.129674	0.0539059	0.135694	-1.52484	4.52253	VPS13C
regulation of protein kinase B signaling (GO:0051896)	2/164	0.0505166	0.129674	0.0518703	0.135694	-1.16338	3.47322	MST1R;ESR1
fatty acid derivative biosynthetic process (GO:1901570)	1/25	0.0536035	0.133097	0.0560025	0.139054	-2.29063	6.70271	ACACA
membrane protein intracellular domain proteolysis (GO:0031293)	1/25	0.0536035	0.133097	0.0560025	0.139054	-2.19217	6.4146	PSEN1
positive regulation of filopodium assembly (GO:0051491)	1/26	0.0556882	0.133725	0.0580946	0.139503	-1.94619	5.62057	PLPPR5
response to alcohol (GO:0097305)	1/26	0.0556882	0.133725	0.0580946	0.139503	-1.78134	5.1445	ADH6
long-chain fatty acid transport (GO:0015909)	1/26	0.0556882	0.133725	0.0580946	0.139503	-1.76729	5.10392	ACACA
response to amyloid-beta (GO:1904645)	1/26	0.0556882	0.133725	0.0580946	0.139503	-1.72632	4.98558	PSEN1
monocarboxylic acid catabolic process (GO:0072329)	1/26	0.0556882	0.133725	0.0580946	0.139503	-1.58502	4.57752	HAO1
bile acid biosynthetic process (GO:0006699)	1/27	0.0577684	0.136035	0.0601822	0.141719	-1.9146	5.45911	CYP7B1
monovalent inorganic cation homeostasis (GO:0055067)	1/27	0.0577684	0.136035	0.0601822	0.141719	-1.83561	5.23389	CLCN3
fat-soluble vitamin metabolic process (GO:0006775)	1/27	0.0577684	0.136035	0.0601822	0.141719	-1.38678	3.95416	CYP3A4
cellular response to glucose stimulus (GO:0071333)	1/28	0.0598441	0.137378	0.0622653	0.142043	-1.90325	5.35958	UNC13B
protein targeting to vacuole (GO:0006623)	1/28	0.0598441	0.137378	0.0622653	0.142043	-1.88341	5.3037	VPS13C
protein localization to chromosome (GO:0034502)	1/28	0.0598441	0.137378	0.0622653	0.142043	-1.85042	5.21081	ESR1
regulation of intracellular steroid hormone receptor signaling pathway (GO:0033143)	1/28	0.0598441	0.137378	0.0622653	0.142043	-1.57898	4.44643	ESR1
tube closure (GO:0060606)	1/30	0.0639821	0.138186	0.0664182	0.143448	-2.11174	5.80549	MTHFD1L
regulation of receptor internalization (GO:0002090)	1/29	0.0619153	0.138186	0.064344	0.143205	-1.97694	5.49983	TBC1D5
primary neural tube formation (GO:0014020)	1/29	0.0619153	0.138186	0.064344	0.143205	-1.86554	5.18991	MTHFD1L
regulation of macrophage derived foam cell differentiation (GO:0010743)	1/30	0.0639821	0.138186	0.0664182	0.143448	-1.85574	5.10172	APOB
positive regulation of phosphate metabolic process (GO:0045937)	1/29	0.0619153	0.138186	0.064344	0.143205	-1.8236	5.07324	PSEN1
positive regulation of protein phosphorylation (GO:0001934)	3/413	0.0621712	0.138186	0.0633505	0.143205	-1.62901	4.52518	MST1R;ADRA1B;FNIP2
regulation of vasoconstriction (GO:0019229)	1/30	0.0639821	0.138186	0.0664182	0.143448	-1.58225	4.34985	ADRA1B
coenzyme biosynthetic process (GO:0009108)	1/30	0.0639821	0.138186	0.0664182	0.143448	-1.50172	4.12845	PDXK
vacuolar transport (GO:0007034)	1/30	0.0639821	0.138186	0.0664182	0.143448	-1.49947	4.12228	VPS13C
negative regulation of programmed cell death (GO:0043069)	3/409	0.0607395	0.138186	0.0618991	0.142043	-1.13229	3.17172	MST1R;PSEN1;NTSR1
bile acid metabolic process (GO:0008206)	1/31	0.0660445	0.138542	0.0684879	0.143667	-1.928	5.2392	CYP7B1
fatty-acyl-CoA biosynthetic process (GO:0046949)	1/31	0.0660445	0.138542	0.0684879	0.143667	-1.68919	4.59025	ACACA
positive regulation of phospholipase C activity (GO:0010863)	1/31	0.0660445	0.138542	0.0684879	0.143667	-1.53171	4.1623	ESR1
regulation of intracellular estrogen receptor signaling pathway (GO:0033146)	1/31	0.0660445	0.138542	0.0684879	0.143667	-1.49455	4.06132	ESR1
response to estradiol (GO:0032355)	1/31	0.0660445	0.138542	0.0684879	0.143667	-1.48581	4.03759	ESR1
secondary alcohol metabolic process (GO:1902652)	1/32	0.0681024	0.140437	0.0705532	0.145491	-1.71334	4.60329	APOB
regulation of dendritic spine development (GO:0060998)	1/32	0.0681024	0.140437	0.0705532	0.145491	-1.71097	4.59695	PSEN1
positive regulation of viral genome replication (GO:0045070)	1/32	0.0681024	0.140437	0.0705532	0.145491	-1.48017	3.97683	NR5A2
positive regulation of dendrite development (GO:1900006)	1/33	0.0701558	0.143055	0.0726141	0.148068	-1.84135	4.89253	PSEN1
mitochondrial transmembrane transport (GO:1990542)	1/33	0.0701558	0.143055	0.0726141	0.148068	-1.52416	4.04975	ACACA
cellular glucose homeostasis (GO:0001678)	1/34	0.0722049	0.144015	0.0746705	0.148933	-1.75076	4.60144	UNC13B
intracellular pH reduction (GO:0051452)	1/34	0.0722049	0.144015	0.0746705	0.148933	-1.7386	4.56946	CLCN3
neural tube closure (GO:0001843)	1/34	0.0722049	0.144015	0.0746705	0.148933	-1.71806	4.51547	MTHFD1L
positive regulation of catalytic activity (GO:0043085)	1/34	0.0722049	0.144015	0.0746705	0.148933	-1.61758	4.25139	PSEN1
regulation of alcohol biosynthetic process (GO:1902930)	1/35	0.0742495	0.146492	0.0767225	0.151371	-1.74759	4.54431	ACACA
regulation of MAPK cascade (GO:0043408)	2/204	0.0741018	0.146492	0.0757667	0.150298	-1.22058	3.17634	MST1R;ADRA1B
regulation of filopodium assembly (GO:0051489)	1/37	0.0783255	0.1489	0.0808133	0.153629	-2.10449	5.35989	PLPPR5
positive regulation of phosphorylation (GO:0042327)	2/209	0.077261	0.1489	0.078965	0.15331	-1.6273	4.1668	MST1R;PSEN1
endosome organization (GO:0007032)	1/37	0.0783255	0.1489	0.0808133	0.153629	-1.61543	4.1143	CLCN3
organophosphate biosynthetic process (GO:0090407)	1/37	0.0783255	0.1489	0.0808133	0.153629	-1.55488	3.9601	PDXK
positive regulation of peptide secretion (GO:0002793)	1/36	0.0762897	0.1489	0.0787701	0.15331	-1.41936	3.65233	UNC13B
vesicle-mediated transport in synapse (GO:0099003)	1/37	0.0783255	0.1489	0.0808133	0.153629	-1.38584	3.52958	UNC13B
membrane protein proteolysis (GO:0033619)	1/36	0.0762897	0.1489	0.0787701	0.15331	-1.31869	3.39327	PSEN1
regulation of protein modification process (GO:0031399)	1/43	0.0904487	0.161996	0.0929807	0.165532	-1.89327	4.54949	FNIP2
positive regulation of receptor-mediated endocytosis (GO:0048260)	1/42	0.0884391	0.161996	0.0909637	0.165532	-1.80705	4.38289	TBC1D5
neutrophil degranulation (GO:0043312)	3/480	0.088432	0.161996	0.0899681	0.165532	-1.69718	4.11655	PDXK;PSEN1;SLC2A5
regulation of cholesterol biosynthetic process (GO:0045540)	1/41	0.0864251	0.161996	0.0889423	0.165532	-1.63334	3.9992	ACACA
regulation of cholesterol metabolic process (GO:0090181)	1/42	0.0884391	0.161996	0.0909637	0.165532	-1.55016	3.75982	ACACA
cellular response to peptide (GO:1901653)	1/42	0.0884391	0.161996	0.0909637	0.165532	-1.45307	3.52433	PSEN1
positive regulation of intracellular signal transduction (GO:1902533)	3/480	0.088432	0.161996	0.0899681	0.165532	-1.32185	3.20617	MST1R;ADRA1B;ESR1
regulation of cellular metabolic process (GO:0031323)	1/42	0.0884391	0.161996	0.0909637	0.165532	-1.28373	3.11362	ACACA
endosomal transport (GO:0016197)	2/230	0.0909789	0.161996	0.0928482	0.165532	-1.21576	2.91434	TBC1D5;VPS13C
neutrophil activation involved in immune response (GO:0002283)	3/484	0.0901297	0.161996	0.0916888	0.165532	-1.08305	2.60636	PDXK;PSEN1;SLC2A5
transcription from RNA polymerase II promoter (GO:0006366)	3/486	0.0909838	0.161996	0.0925544	0.165532	-1.03338	2.47709	NR5A2;ESR1;TAF2
cellular protein metabolic process (GO:0044267)	3/485	0.0905563	0.161996	0.0921212	0.165532	-1.01237	2.43149	ITIH2;PSEN1;APOB
negative regulation of apoptotic process (GO:0043066)	3/486	0.0909838	0.161996	0.0925544	0.165532	-0.911371	2.18462	MST1R;PSEN1;NTSR1
neutrophil mediated immunity (GO:0002446)	3/488	0.0918413	0.162729	0.0934236	0.165532	-1.62446	3.87872	PDXK;PSEN1;SLC2A5
positive regulation of viral life cycle (GO:1903902)	1/45	0.0944551	0.163394	0.0970017	0.167799	-1.8476	4.35966	NR5A2
regulation of steroid biosynthetic process (GO:0050810)	1/45	0.0944551	0.163394	0.0970017	0.167799	-1.7155	4.04795	ACACA
cholesterol transport (GO:0030301)	1/45	0.0944551	0.163394	0.0970017	0.167799	-1.5853	3.74073	APOB
lymphocyte chemotaxis (GO:0048247)	1/45	0.0944551	0.163394	0.0970017	0.167799	-1.31088	3.0932	CYP7B1
regulation of signal transduction (GO:0009966)	2/234	0.0936693	0.163394	0.0955702	0.167799	-1.15302	2.73035	MST1R;ESR1
positive regulation of nucleic acid-templated transcription (GO:1903508)	3/503	0.0983814	0.168676	0.100052	0.172029	-1.61035	3.73424	NR5A2;PSEN1;ESR1
anterograde trans-synaptic signaling (GO:0098916)	2/241	0.0984331	0.168676	0.10039	0.172029	-1.04921	2.43246	UNC13B;NTSR1
negative regulation of I-kappaB kinase/NF-kappaB signaling (GO:0043124)	1/48	0.100432	0.171298	0.103001	0.175679	-1.33409	3.0661	ESR1
intrinsic apoptotic signaling pathway in response to DNA damage (GO:0008630)	1/49	0.102416	0.173064	0.104992	0.176664	-1.40282	3.19662	FNIP2
pattern recognition receptor signaling pathway (GO:0002221)	1/49	0.102416	0.173064	0.104992	0.176664	-1.35573	3.08932	APOB
regulation of apoptotic process (GO:0042981)	4/816	0.103646	0.174336	0.10503	0.176664	-1.44186	3.26837	UNC13B;MST1R;PSEN1;NTSR1
fatty acid oxidation (GO:0019395)	1/51	0.106371	0.178098	0.108961	0.182435	-1.60594	3.59862	HAO1
arachidonic acid metabolic process (GO:0019369)	1/52	0.108342	0.18057	0.11094	0.184899	-1.93413	4.29852	CYP1A2
positive regulation of secretion by cell (GO:1903532)	1/53	0.110309	0.182184	0.112914	0.186486	-1.62951	3.5922	UNC13B
positive regulation of programmed cell death (GO:0043068)	2/258	0.11028	0.182184	0.112372	0.186436	-1.10951	2.44618	UNC13B;PSEN1
positive regulation of protein import into nucleus (GO:0042307)	1/54	0.112271	0.18459	0.114883	0.188885	-1.3356	2.92074	PSEN1
Notch signaling pathway (GO:0007219)	1/56	0.116183	0.190166	0.11881	0.194465	-1.64468	3.54031	PSEN1
positive regulation of protein transport (GO:0051222)	1/57	0.118133	0.191639	0.120767	0.195912	-1.33607	2.85376	UNC13B
organonitrogen compound catabolic process (GO:1901565)	1/57	0.118133	0.191639	0.120767	0.195912	-1.29682	2.76992	CYP3A4
chloride transmembrane transport (GO:1902476)	1/58	0.120079	0.193079	0.12272	0.197326	-1.52129	3.22454	CLCN3
protein homotetramerization (GO:0051289)	1/58	0.120079	0.193079	0.12272	0.197326	-1.41204	2.99297	ACACA
post-Golgi vesicle-mediated transport (GO:0006892)	1/59	0.12202	0.19534	0.124669	0.19958	-1.33033	2.79844	VPS13C
dicarboxylic acid metabolic process (GO:0043648)	1/60	0.123958	0.197575	0.126614	0.201808	-1.55662	3.24993	MTHFD1L
positive regulation of protein binding (GO:0032092)	1/61	0.125891	0.199783	0.128554	0.204009	-1.31543	2.72601	PSEN1
regulation of vesicle fusion (GO:0031338)	1/62	0.12782	0.201096	0.13049	0.205297	-1.38968	2.85875	TBC1D5
negative regulation of transcription from RNA polymerase II promoter (GO:0000122)	3/566	0.127811	0.201096	0.129884	0.205228	-0.903998	1.85971	PSEN1;FNIP2;ESR1
diterpenoid metabolic process (GO:0016101)	1/63	0.129745	0.202379	0.132422	0.206556	-1.25466	2.56226	APOB
negative regulation of peptidase activity (GO:0010466)	1/63	0.129745	0.202379	0.132422	0.206556	-1.15373	2.35614	FETUB
carbohydrate homeostasis (GO:0033500)	1/64	0.131665	0.202775	0.13435	0.20691	-1.23447	2.50288	ADRA1B
regulation of viral genome replication (GO:0045069)	1/64	0.131665	0.202775	0.13435	0.20691	-1.2068	2.44678	NR5A2
positive regulation of cell projection organization (GO:0031346)	1/64	0.131665	0.202775	0.13435	0.20691	-1.08608	2.20201	PLPPR5
inorganic anion transmembrane transport (GO:0098661)	1/65	0.133582	0.203155	0.136274	0.207249	-1.21629	2.44845	CLCN3
chemical synaptic transmission (GO:0007268)	2/290	0.133522	0.203155	0.135872	0.207249	-1.12708	2.26937	UNC13B;NTSR1
positive regulation of MAPK cascade (GO:0043410)	2/290	0.133522	0.203155	0.135872	0.207249	-0.936016	1.88466	MST1R;ADRA1B
defense response to Gram-positive bacterium (GO:0050830)	1/66	0.135494	0.204361	0.138193	0.208432	-1.70456	3.40713	LYG2
fatty acid catabolic process (GO:0009062)	1/66	0.135494	0.204361	0.138193	0.208432	-1.51395	3.02613	HAO1
intracellular steroid hormone receptor signaling pathway (GO:0030518)	1/67	0.137402	0.206386	0.140108	0.210451	-1.1483	2.27919	ESR1
positive regulation of synaptic transmission (GO:0050806)	1/68	0.139306	0.208388	0.14202	0.212447	-1.24558	2.45514	UNC13B
regulation of endopeptidase activity (GO:0052548)	1/69	0.141206	0.209513	0.143927	0.21355	-1.24605	2.43918	FETUB
cholesterol metabolic process (GO:0008203)	1/69	0.141206	0.209513	0.143927	0.21355	-1.21642	2.38118	APOB
positive regulation of plasma membrane bounded cell projection assembly (GO:0120034)	1/70	0.143102	0.210614	0.14583	0.214629	-1.61628	3.14237	PLPPR5
response to organic cyclic compound (GO:0014070)	1/70	0.143102	0.210614	0.14583	0.214629	-1.22444	2.38055	ESR1
neuropeptide signaling pathway (GO:0007218)	1/71	0.144994	0.211691	0.147729	0.215684	-1.14479	2.21067	NTSR1
phospholipid metabolic process (GO:0006644)	1/71	0.144994	0.211691	0.147729	0.215684	-1.1415	2.20431	PLPPR5
positive regulation of apoptotic process (GO:0043065)	2/308	0.147054	0.213843	0.149551	0.217474	-1.37086	2.62787	UNC13B;PSEN1
chloride transport (GO:0006821)	1/74	0.150645	0.216478	0.153401	0.220439	-1.71258	3.24163	CLCN3
regulation of protein complex assembly (GO:0043254)	1/74	0.150645	0.216478	0.153401	0.220439	-1.66735	3.156	FNIP2
canonical Wnt signaling pathway (GO:0060070)	1/74	0.150645	0.216478	0.153401	0.220439	-1.12149	2.12279	PSEN1
glucose homeostasis (GO:0042593)	1/75	0.15252	0.218313	0.155284	0.222269	-1.11304	2.09302	ADRA1B
retinoid metabolic process (GO:0001523)	1/76	0.154392	0.220129	0.157162	0.224079	-1.324	2.47358	APOB
nucleic acid-templated transcription (GO:0097659)	1/77	0.156259	0.221925	0.159037	0.22587	-1.50631	2.79607	ESR1
adenylate cyclase-activating G-protein coupled receptor signaling pathway (GO:0007189)	1/79	0.159982	0.225457	0.162774	0.229392	-1.41633	2.5957	ADRA1B
negative regulation of cell communication (GO:0010648)	1/79	0.159982	0.225457	0.162774	0.229392	-1.16361	2.13254	MST1R
steroid biosynthetic process (GO:0006694)	1/80	0.161837	0.227195	0.164636	0.231124	-1.18928	2.16588	CYP7B1
positive regulation of peptidyl-serine phosphorylation (GO:0033138)	1/84	0.169219	0.230466	0.172046	0.234316	-1.92088	3.41257	FNIP2
protein maturation (GO:0051604)	1/84	0.169219	0.230466	0.172046	0.234316	-1.59948	2.84158	PSEN1
retrograde transport, endosome to Golgi (GO:0042147)	1/83	0.16738	0.230466	0.1702	0.234316	-1.22969	2.19806	TBC1D5
ephrin receptor signaling pathway (GO:0048013)	1/83	0.16738	0.230466	0.1702	0.234316	-1.17968	2.10867	PSEN1
negative regulation of signaling (GO:0023057)	1/84	0.169219	0.230466	0.172046	0.234316	-1.1803	2.09688	MST1R
positive regulation of binding (GO:0051099)	1/82	0.165536	0.230466	0.168349	0.234316	-1.16102	2.08816	PSEN1
positive regulation of protein secretion (GO:0050714)	1/83	0.16738	0.230466	0.1702	0.234316	-1.1225	2.00645	UNC13B
negative regulation of endopeptidase activity (GO:0010951)	1/84	0.169219	0.230466	0.172046	0.234316	-1.06584	1.89354	FETUB
activation of GTPase activity (GO:0090630)	1/85	0.171054	0.23124	0.173889	0.235071	-1.24679	2.20155	TBC1D5
positive regulation of supramolecular fiber organization (GO:1902905)	1/85	0.171054	0.23124	0.173889	0.235071	-1.09363	1.93111	PSEN1
regulation of peptidyl-serine phosphorylation (GO:0033135)	1/87	0.174713	0.23445	0.177562	0.238272	-1.62479	2.83462	FNIP2
toll-like receptor signaling pathway (GO:0002224)	1/87	0.174713	0.23445	0.177562	0.238272	-1.08394	1.89106	APOB
regulation of MAP kinase activity (GO:0043405)	1/88	0.176537	0.235168	0.179392	0.238971	-1.69365	2.93717	MST1R
positive regulation of cellular component biogenesis (GO:0044089)	1/88	0.176537	0.235168	0.179392	0.238971	-1.22469	2.12388	FNIP2
divalent metal ion transport (GO:0070838)	1/89	0.178357	0.236728	0.181219	0.240527	-1.23507	2.12922	PSEN1
protein tetramerization (GO:0051262)	1/91	0.181984	0.240667	0.18486	0.244471	-1.63207	2.78078	ACACA
transcription, DNA-templated (GO:0006351)	2/357	0.185169	0.243996	0.188071	0.247819	-1.43352	2.41761	ESR1;TAF2
post-translational protein modification (GO:0043687)	2/358	0.185963	0.24416	0.188873	0.247981	-0.954106	1.605	ITIH2;APOB
transcription elongation from RNA polymerase II promoter (GO:0006368)	1/96	0.190984	0.249854	0.193895	0.253662	-1.19522	1.97876	TAF2
positive regulation of protein metabolic process (GO:0051247)	1/97	0.192773	0.251293	0.195691	0.255097	-1.1965	1.96974	PSEN1
positive regulation of neuron projection development (GO:0010976)	1/98	0.194557	0.252717	0.197482	0.256516	-1.0065	1.64766	PLPPR5
positive regulation of neuron differentiation (GO:0045666)	1/99	0.196338	0.254125	0.19927	0.25792	-0.993313	1.61703	PLPPR5
intrinsic apoptotic signaling pathway (GO:0097193)	1/102	0.201657	0.258263	0.204609	0.262043	-1.42108	2.27542	FNIP2
protein processing (GO:0016485)	1/102	0.201657	0.258263	0.204609	0.262043	-1.23865	1.98331	PSEN1
regulation of kinase activity (GO:0043549)	1/102	0.201657	0.258263	0.204609	0.262043	-1.13428	1.8162	MST1R
peptide metabolic process (GO:0006518)	1/105	0.206942	0.264104	0.209914	0.267898	-1.09035	1.71765	PSEN1
positive regulation of cellular component organization (GO:0051130)	1/107	0.210446	0.26764	0.213432	0.271438	-0.998242	1.55579	FNIP2
regulation of protein secretion (GO:0050708)	1/108	0.212192	0.268924	0.215185	0.272717	-1.02842	1.59432	UNC13B
DNA-templated transcription, elongation (GO:0006354)	1/109	0.213935	0.270194	0.216935	0.273983	-1.43024	2.20555	TAF2
Wnt signaling pathway (GO:0016055)	1/110	0.215674	0.271451	0.21868	0.275235	-1.04529	1.60346	PSEN1
transmembrane receptor protein tyrosine kinase signaling pathway (GO:0007169)	2/397	0.217261	0.271761	0.220497	0.275622	-1.30809	1.997	MST1R;PSEN1
macroautophagy (GO:0016236)	1/111	0.217409	0.271761	0.220422	0.275622	-1.06547	1.62588	TBC1D5
regulation of protein binding (GO:0043393)	1/112	0.21914	0.27299	0.22216	0.276752	-1.21884	1.85025	PSEN1
positive regulation of kinase activity (GO:0033674)	1/114	0.222591	0.27541	0.225625	0.279163	-1.53402	2.30474	MST1R
regulation of organelle organization (GO:0033043)	1/114	0.222591	0.27541	0.225625	0.279163	-1.17556	1.76618	TBC1D5
regulation of transcription from RNA polymerase II promoter (GO:0006357)	5/1479	0.223494	0.275592	0.226698	0.279543	-1.01982	1.52807	NR5A2;PSEN1;FNIP2;ESR1;TAF2
chromatin remodeling (GO:0006338)	1/117	0.22774	0.279883	0.230794	0.283636	-1.62723	2.40756	ESR1
positive regulation of protein serine/threonine kinase activity (GO:0071902)	1/119	0.231155	0.281899	0.234222	0.285923	-1.50959	2.21105	MST1R
positive regulation of transcription, DNA-templated (GO:0045893)	4/1121	0.231698	0.281899	0.23524	0.286095	-1.231	1.80012	NR5A2;PSEN1;ESR1;TAF2
calcium ion transport (GO:0006816)	1/119	0.231155	0.281899	0.234222	0.285923	-1.15554	1.69248	PSEN1
regulation of neuron projection development (GO:0010975)	1/120	0.232856	0.282367	0.23593	0.286095	-0.966614	1.40868	PLPPR5
negative regulation of macromolecule metabolic process (GO:0010605)	1/125	0.241309	0.28878	0.244416	0.292498	-1.36323	1.93808	ESR1
positive regulation of gene expression (GO:0010628)	3/772	0.240632	0.28878	0.244315	0.292498	-1.24172	1.76881	NR5A2;PSEN1;ESR1
dephosphorylation (GO:0016311)	1/125	0.241309	0.28878	0.244416	0.292498	-1.08915	1.54841	PLPPR5
cellular calcium ion homeostasis (GO:0006874)	1/124	0.239626	0.28878	0.242726	0.292498	-1.05852	1.51228	PSEN1
G-protein coupled receptor signaling pathway, coupled to cyclic nucleotide second messenger (GO:0007187)	1/126	0.242989	0.28984	0.246102	0.293554	-1.31675	1.86286	ADRA1B
G2/M transition of mitotic cell cycle (GO:0000086)	1/127	0.244665	0.290888	0.247785	0.294598	-1.08399	1.52611	TAF2
cell cycle G2/M phase transition (GO:0044839)	1/128	0.246337	0.291925	0.249464	0.295631	-1.41011	1.97564	TAF2
regulation of mRNA stability (GO:0043488)	1/129	0.248006	0.292952	0.251139	0.296653	-1.36001	1.89626	CARHSP1
protein targeting (GO:0006605)	1/134	0.256296	0.301767	0.259462	0.305495	-1.29294	1.76024	VPS13C
adenylate cyclase-modulating G-protein coupled receptor signaling pathway (GO:0007188)	1/135	0.257943	0.30273	0.261115	0.306454	-1.04991	1.42265	ADRA1B
cellular response to organic cyclic compound (GO:0071407)	1/136	0.259586	0.303683	0.262765	0.307402	-1.05711	1.42569	ESR1
regulation of signal transduction by p53 class mediator (GO:1901796)	1/139	0.264496	0.306479	0.267694	0.310185	-1.19896	1.59454	TAF2
positive regulation of transferase activity (GO:0051347)	1/138	0.262863	0.306479	0.266055	0.310185	-1.01429	1.35522	MST1R
regulation of vesicle-mediated transport (GO:0060627)	1/139	0.264496	0.306479	0.267694	0.310185	-0.977516	1.30003	TBC1D5
negative regulation of transcription, DNA-templated (GO:0045892)	3/814	0.265623	0.306812	0.269678	0.31101	-1.23889	1.64237	PSEN1;FNIP2;ESR1
negative regulation of sequence-specific DNA binding transcription factor activity (GO:0043433)	1/141	0.267751	0.307325	0.270962	0.31101	-1.37429	1.8109	ESR1
response to lipid (GO:0033993)	1/141	0.267751	0.307325	0.270962	0.31101	-1.123	1.47977	ESR1
positive regulation of transcription from RNA polymerase II promoter (GO:0045944)	3/849	0.286715	0.32806	0.291085	0.33306	-1.37197	1.71395	NR5A2;ESR1;TAF2
negative regulation of intracellular signal transduction (GO:1902532)	1/162	0.301093	0.343435	0.304437	0.347248	-1.06415	1.27734	ESR1
mitochondrion organization (GO:0007005)	1/168	0.310344	0.352883	0.313724	0.356726	-1.00652	1.1777	VPS13C
positive regulation of cellular process (GO:0048522)	2/520	0.31777	0.360206	0.322031	0.365035	-1.04149	1.19399	MST1R;ACACA
positive regulation of MAP kinase activity (GO:0043406)	1/178	0.325496	0.367821	0.328936	0.371708	-1.14051	1.28011	MST1R
cellular response to lipid (GO:0071396)	1/179	0.326994	0.368373	0.330439	0.372254	-0.935043	1.0452	ESR1
phosphate-containing compound metabolic process (GO:0006796)	1/184	0.334431	0.375592	0.337906	0.379495	-1.08544	1.1889	PLPPR5
receptor-mediated endocytosis (GO:0006898)	1/189	0.341789	0.382677	0.345293	0.386601	-1.1388	1.22257	APOB
protein homooligomerization (GO:0051260)	1/191	0.344709	0.384767	0.348225	0.388691	-1.18738	1.26462	ACACA
positive regulation of GTPase activity (GO:0043547)	1/193	0.347617	0.38683	0.351144	0.390755	-0.97623	1.03154	TBC1D5
positive regulation of cell differentiation (GO:0045597)	1/195	0.350512	0.388866	0.354051	0.392792	-0.993193	1.04122	APOB
positive regulation of ERK1 and ERK2 cascade (GO:0070374)	1/202	0.360547	0.398787	0.364125	0.402745	-1.19532	1.21938	MST1R
regulation of I-kappaB kinase/NF-kappaB signaling (GO:0043122)	1/205	0.364802	0.402274	0.368396	0.406237	-1.02193	1.03052	ESR1
positive regulation of signal transduction (GO:0009967)	1/207	0.367622	0.404163	0.371228	0.408127	-0.956094	0.956763	UNC13B
regulation of canonical Wnt signaling pathway (GO:0060828)	1/214	0.377399	0.413665	0.381043	0.41766	-1.04582	1.0191	PSEN1
cellular protein modification process (GO:0006464)	3/1002	0.379884	0.41421	0.385658	0.420195	-1.25988	1.21942	ITIH2;APOB;FNIP2
positive regulation of sequence-specific DNA binding transcription factor activity (GO:0051091)	1/216	0.380165	0.41421	0.38382	0.419444	-1.02828	0.994498	ESR1
regulation of nucleic acid-templated transcription (GO:1903506)	2/608	0.38838	0.420661	0.393339	0.42602	-1.46655	1.38702	NR5A2;ESR1
mitotic cell cycle phase transition (GO:0044772)	1/222	0.388391	0.420661	0.392078	0.425918	-0.925335	0.875128	TAF2
regulation of cellular macromolecule biosynthetic process (GO:2000112)	2/632	0.40715	0.439674	0.41229	0.445224	-0.984843	0.884953	NR5A2;ESR1
defense response to bacterium (GO:0042742)	1/242	0.415049	0.446882	0.418839	0.450962	-1.21329	1.06691	LYG2
regulation of ERK1 and ERK2 cascade (GO:0070372)	1/248	0.422823	0.453913	0.426642	0.458013	-0.821836	0.707439	MST1R
protein deubiquitination (GO:0016579)	1/258	0.435555	0.46621	0.439422	0.470349	-1.32129	1.09817	ESR1
protein modification by small protein removal (GO:0070646)	1/262	0.44057	0.468829	0.444456	0.472964	-0.97489	0.799103	ESR1
regulation of protein phosphorylation (GO:0001932)	1/262	0.44057	0.468829	0.444456	0.472964	-0.928954	0.76145	FNIP2
endocytosis (GO:0006897)	1/264	0.443062	0.470109	0.446957	0.474242	-1.28741	1.04801	APOB
cellular response to oxygen-containing compound (GO:1901701)	1/275	0.456572	0.48304	0.460518	0.487214	-0.92512	0.725302	ESR1
positive regulation of macromolecule metabolic process (GO:0010604)	1/277	0.458994	0.484199	0.462948	0.488371	-1.31257	1.02213	TBC1D5
negative regulation of signal transduction (GO:0009968)	1/284	0.467387	0.491632	0.471373	0.495824	-0.997972	0.759055	MST1R
proteolysis (GO:0006508)	1/292	0.476824	0.500117	0.480844	0.504333	-1.31292	0.972359	PSEN1
protein transport (GO:0015031)	1/327	0.516224	0.539476	0.520381	0.543815	-1.35314	0.894715	TBC1D5
cellular protein localization (GO:0034613)	1/328	0.517306	0.539476	0.521467	0.543815	-0.914585	0.602822	TBC1D5
cellular response to DNA damage stimulus (GO:0006974)	1/330	0.519463	0.540182	0.523631	0.544517	-1.04568	0.68488	FNIP2
intracellular protein transport (GO:0006886)	1/348	0.538456	0.558342	0.542686	0.562729	-1.19841	0.741877	TBC1D5
cellular macromolecule biosynthetic process (GO:0034645)	1/368	0.558699	0.577692	0.562993	0.582132	-1.28099	0.745719	ESR1
phosphorylation (GO:0016310)	1/387	0.577125	0.595059	0.581474	0.599542	-1.13996	0.626633	FNIP2
vesicle-mediated transport (GO:0016192)	1/411	0.599329	0.615403	0.603738	0.619926	-1.16451	0.596166	TBC1D5
gene expression (GO:0010467)	1/412	0.600229	0.615403	0.604641	0.619926	-0.933372	0.476435	ESR1
regulation of intracellular signal transduction (GO:1902531)	1/423	0.609999	0.623668	0.614436	0.628205	-1.38567	0.684933	TAF2
positive regulation of cell proliferation (GO:0008284)	1/425	0.61175	0.623712	0.616191	0.62824	-1.10348	0.542283	MST1R
nervous system development (GO:0007399)	1/456	0.63793	0.648592	0.642431	0.653168	-0.979185	0.440169	NAV2
protein phosphorylation (GO:0006468)	1/471	0.649971	0.658998	0.654496	0.663586	-0.838527	0.361261	FNIP2
regulation of gene expression (GO:0010468)	2/1038	0.673615	0.681079	0.68079	0.688333	-1.27676	0.504442	NR5A2;ESR1
regulation of transcription, DNA-templated (GO:0006355)	3/1599	0.694326	0.70008	0.703925	0.707804	-1.19177	0.434772	NR5A2;PSEN1;ESR1
negative regulation of cellular process (GO:0048523)	1/535	0.697093	0.700934	0.701686	0.707501	-1.02455	0.369694	VPS13C
negative regulation of gene expression (GO:0010629)	1/619	0.749634	0.751694	0.754237	0.756309	-0.898039	0.258788	ESR1
regulation of cell proliferation (GO:0042127)	1/741	0.810429	0.810429	0.814914	0.814914	-0.83686	0.175901	MST1R

## Sheet: Down_KEGG-pathway
Term	Overlap	P-value	Adjusted P-value	Old P-value	Old Adjusted P-value	Z-score	Combined Score	Genes
Drug metabolism	4/108	9.24305e-05	0.00526854	0.000285486	0.0162727	-9.89004	91.8691	DPYD;CYP1A2;CYP3A4;ADH6
Retinol metabolism	3/67	0.000431359	0.00819581	0.00106804	0.0200672	-85.5496	662.887	CYP1A2;CYP3A4;ADH6
Steroid hormone biosynthesis	3/60	0.000311457	0.00819581	0.000785267	0.0200672	-36.5153	294.833	CYP1A2;CYP7B1;CYP3A4
Metabolism of xenobiotics by cytochrome P450	3/74	0.000577478	0.00822906	0.00140823	0.0200672	-103.714	773.382	CYP1A2;CYP3A4;ADH6
Chemical carcinogenesis	3/82	0.000779321	0.00888425	0.00187253	0.0213469	-113.924	815.367	CYP1A2;CYP3A4;ADH6
Linoleic acid metabolism	2/29	0.00184931	0.0175684	0.00364898	0.0346654	-77.525	487.861	CYP1A2;CYP3A4
Starch and sucrose metabolism	2/36	0.00284172	0.0231397	0.00544818	0.0443638	-38.6227	226.458	GYS2;GBE1
Caffeine metabolism	1/5	0.0109528	0.0780387	0.0175123	0.124775	-33.5479	151.44	CYP1A2
Vitamin B6 metabolism	1/6	0.0131292	0.0831519	0.0204023	0.129215	-23.7663	102.977	PDXK
Glucagon signaling pathway	2/103	0.0215905	0.123066	0.037571	0.209377	-4.63716	17.7858	GYS2;ACACA
Fatty acid biosynthesis	1/13	0.0282339	0.136164	0.0404061	0.209377	-45.1229	160.964	ACACA
AMPK signaling pathway	2/120	0.0286662	0.136164	0.0492893	0.221446	-11.3134	40.1856	GYS2;ACACA
Primary bile acid biosynthesis	1/17	0.0367634	0.14968	0.0516608	0.221446	-10.2113	33.7304	CYP7B1
Insulin signaling pathway	2/137	0.0365378	0.14968	0.0621602	0.221446	-3.41101	11.2884	GYS2;ACACA
One carbon pool by folate	1/20	0.0431125	0.153588	0.0600188	0.221446	-13.11	41.2172	MTHFD1L
Pantothenate and CoA biosynthesis	1/19	0.0410007	0.153588	0.0572406	0.221446	-11.3601	36.2861	DPYD
Glyoxylate and dicarboxylate metabolism	1/30	0.0639821	0.161743	0.087373	0.229863	-785.196	2158.62	HAO1
Maturity onset diabetes of the young	1/26	0.0556882	0.161743	0.076524	0.229863	-57.3253	165.555	NR5A2
Butanoate metabolism	1/28	0.0598441	0.161743	0.0819638	0.229863	-27.6275	77.7995	ACSM5
Vitamin digestion and absorption	1/24	0.0515143	0.161743	0.0710533	0.229863	-22.0834	65.4972	APOB
beta-Alanine metabolism	1/31	0.0660445	0.161743	0.0900662	0.229863	-19.3076	52.467	DPYD
Propanoate metabolism	1/32	0.0681024	0.161743	0.0927517	0.229863	-10.8411	29.1271	ACACA
Pentose phosphate pathway	1/30	0.0639821	0.161743	0.087373	0.229863	-10.0285	27.5698	H6PD
Calcium signaling pathway	2/188	0.0642931	0.161743	0.106432	0.232669	-0.525489	1.4421	ADRA1B;NTSR1
Endocrine and other factor-regulated calcium reabsorption	1/48	0.100432	0.173474	0.134703	0.232669	-264.126	607.033	ESR1
Basal transcription factors	1/45	0.0944551	0.173474	0.126981	0.232669	-57.5827	135.874	TAF2
Fatty acid degradation	1/44	0.092454	0.173474	0.124393	0.232669	-43.1918	102.842	ADH6
Fat digestion and absorption	1/41	0.0864251	0.173474	0.116583	0.232669	-40.0186	97.9847	APOB
Carbohydrate digestion and absorption	1/44	0.092454	0.173474	0.124393	0.232669	-29.9074	71.2108	SLC2A5
Tyrosine metabolism	1/36	0.0762897	0.173474	0.103418	0.232669	-18.2508	46.9634	ADH6
Pyruvate metabolism	1/39	0.082384	0.173474	0.111339	0.232669	-14.527	36.2648	ACACA
Tryptophan metabolism	1/42	0.0884391	0.173474	0.119194	0.232669	-14.5174	35.2111	CYP1A2
Notch signaling pathway	1/48	0.100432	0.173474	0.134703	0.232669	-12.3829	28.4594	PSEN1
Cholesterol metabolism	1/50	0.104396	0.175016	0.139815	0.234395	-26.0722	58.9119	APOB
Pyrimidine metabolism	1/57	0.118133	0.192389	0.157478	0.256465	-19.2136	41.0392	DPYD
Bile secretion	1/72	0.146882	0.220322	0.194169	0.291253	-15.3836	29.5078	CYP3A4
Prolactin signaling pathway	1/70	0.143102	0.220322	0.189367	0.291253	-10.6943	20.7919	ESR1
Glycolysis / Gluconeogenesis	1/68	0.139306	0.220322	0.184537	0.291253	-5.00101	9.8574	ADH6
Synaptic vesicle cycle	1/78	0.158123	0.231102	0.208413	0.304603	-81.6405	150.576	UNC13B
Peroxisome	1/83	0.16738	0.236618	0.220098	0.31364	-8.7479	15.6368	HAO1
Neuroactive ligand-receptor interaction	2/338	0.170199	0.236618	0.263916	0.358171	65.9286	-116.745	ADRA1B;NTSR1
Salivary secretion	1/90	0.180172	0.244519	0.236181	0.328349	-42.6078	73.023	ADRA1B
Insulin resistance	1/108	0.212192	0.281278	0.276094	0.365985	-4.48621	6.9548	GYS2
Thyroid hormone signaling pathway	1/116	0.226028	0.292796	0.293185	0.379359	-27.9758	41.6028	ESR1
Neurotrophin signaling pathway	1/119	0.231155	0.292796	0.299494	0.379359	-10.584	15.5021	PSEN1
Vascular smooth muscle contraction	1/132	0.25299	0.313488	0.326217	0.404225	-3.93387	5.40672	ADRA1B
Estrogen signaling pathway	1/137	0.261226	0.316806	0.336233	0.407772	-1.277	1.7142	ESR1
Breast cancer	1/147	0.277433	0.322728	0.355839	0.413935	-3.52109	4.51465	ESR1
Adrenergic signaling in cardiomyocytes	1/145	0.27422	0.322728	0.351963	0.413935	-2.51679	3.25628	ADRA1B
mTOR signaling pathway	1/152	0.285405	0.325362	0.365434	0.416594	0.546525	-0.685258	FNIP2
Wnt signaling pathway	1/158	0.294859	0.329548	0.376766	0.421092	1.30677	-1.5959	PSEN1
cGMP-PKG signaling pathway	1/166	0.307274	0.336819	0.391576	0.429227	0.301385	-0.355639	ADRA1B
Alzheimer disease	1/171	0.314924	0.338692	0.40066	0.430899	-0.164646	0.190236	PSEN1
Proteoglycans in cancer	1/201	0.359123	0.379074	0.452501	0.47764	23.2918	-23.8529	ESR1
Human papillomavirus infection	1/330	0.519463	0.538352	0.630467	0.653393	119.604	-78.3357	PSEN1
PI3K-Akt signaling pathway	1/354	0.544622	0.554348	0.656786	0.668514	90.9286	-55.2539	GYS2
Pathways in cancer	1/530	0.693647	0.693647	0.801825	0.801825	187.507	-68.5884	ESR1
